# Supplementary material for: Efficacy of Antibiotic Combinations against Multidrug-Resistant Pseudomonas aeruginosa in Automated Time-Lapse Microscopy and Static Time-Kill Experiments
Source: PubMed Central journal article supplement (PMC7269485; doi:10.1128/aac.02111-19), 2020-05-21
Supplement: AAC.02111-19-s0001.pdf [file AAC.02111-19-s0001.pdf]

Supplementary data.

**Table S1.** Results of time-lapse microscopy experiments with polymyxin B and 13 other antibiotics, alone and in combination, at various concentrations (mg/L). Background Corrected Absorption (BCA) at 24 h and the maximum Segmentation and Extraction of Surface Area (SESA<sub>max</sub>) of duplicate experiments are presented. BCA >8.0 at 24 h and SESA<sub>max</sub> >5.8 were used as cut-offs indicating bacterial density >10<sup>6</sup> CFU/mL (highlighted in grey). Combinations that prevented bacterial growth at 24 h while none of the single antibiotics did were subsequently evaluated in the time-kill experiments at the concentrations indicated in bold.

## Supplementary data.

| <b>Amikacin</b>  |          | AMK 0 |      | AMK 4       |             | AMK 16      |             | AMK 128     |             | AMK 0 |      | AMK 4       |             | AMK 16 |      | AMK 128     |             |
|------------------|----------|-------|------|-------------|-------------|-------------|-------------|-------------|-------------|-------|------|-------------|-------------|--------|------|-------------|-------------|
| <b>ARU617</b>    | PMB 0    | 6.17  | 9.02 | 6.28        | 8.94        | 4.46        | 8.13        | 5.11        | 7.45        | 6.19  | 9.02 | 6.27        | 8.77        | 4.98   | 6.66 | 4.09        | 7.21        |
|                  | PMB 0.25 | 6.22  | 9.02 | 6.27        | 8.96        | 4.90        | 8.35        | 4.82        | 7.87        | 6.19  | 9.04 | 6.29        | 8.59        | 4.31   | 4.67 | 3.91        | 5.40        |
|                  | PMB 0.5  | 4.03  | 5.06 | 4.68        | 7.04        | 4.40        | 7.80        | 4.13        | 7.42        | 4.74  | 6.78 | 3.61        | 5.15        | 4.50   | 6.09 | 4.51        | 5.95        |
|                  | PMB 1    | 4.34  | 5.55 | 4.35        | 6.30        | 4.23        | 6.97        | 4.59        | 6.37        | 3.93  | 6.39 | 4.29        | 5.88        | 4.26   | 5.90 | 4.59        | 6.49        |
|                  | PMB 2    | 4.17  | 5.90 | 3.98        | 6.30        | 4.21        | 6.13        | 4.01        | 6.89        | 4.41  | 7.20 | 4.55        | 5.53        | 4.06   | 5.60 | 4.56        | 6.31        |
| <b>ARU620</b>    | PMB 0    | 5.91  | 9.07 | 6.18        | 8.95        | 5.28        | 6.61        | 5.10        | 6.78        | 5.99  | 9.02 | 6.20        | 8.95        | 5.65   | 6.71 | 5.44        | 6.43        |
|                  | PMB 0.25 | 5.95  | 9.07 | <b>5.54</b> | <b>7.13</b> | 5.19        | 6.02        | 5.09        | 6.04        | 6.05  | 9.02 | <b>5.49</b> | <b>6.69</b> | 5.48   | 6.08 | 5.33        | 5.95        |
|                  | PMB 0.5  | 5.00  | 6.74 | 5.07        | 5.88        | 5.16        | 6.20        | 5.17        | 6.13        | 6.17  | 9.07 | 5.47        | 7.38        | 5.37   | 6.13 | 5.43        | 6.25        |
|                  | PMB 1    | 4.80  | 5.99 | 4.91        | 7.29        | 5.03        | 6.67        | 5.04        | 6.24        | 5.20  | 6.82 | 5.23        | 6.53        | 5.27   | 6.80 | 5.32        | 7.02        |
|                  | PMB 2    | 4.78  | 6.37 | 4.88        | 6.26        | 4.86        | 6.27        | 4.98        | 6.24        | 5.19  | 7.80 | 5.20        | 7.27        | 5.25   | 7.60 | 5.28        | 7.33        |
| <b>ARU622</b>    | PMB 0    | 6.08  | 9.01 | 6.18        | 9.00        | 5.12        | 5.64        | 5.16        | 6.02        | 6.09  | 9.07 | 4.99        | 6.67        | 4.92   | 6.88 | 4.80        | 6.12        |
|                  | PMB 0.25 | 6.09  | 9.03 | 6.13        | 8.98        | 5.07        | 5.80        | 5.03        | 5.79        | 6.11  | 9.07 | 4.78        | 5.89        | 3.89   | 5.18 | 4.71        | 5.50        |
|                  | PMB 0.5  | 5.07  | 6.18 | 4.99        | 5.35        | 5.12        | 5.53        | 4.74        | 5.52        | 4.79  | 6.64 | 4.80        | 6.37        | 4.60   | 6.02 | 4.62        | 6.18        |
|                  | PMB 1    | 5.37  | 7.16 | 5.00        | 5.51        | 4.97        | 5.85        | 4.85        | 6.05        | 4.57  | 6.05 | 4.53        | 5.54        | 4.32   | 5.96 | 4.54        | 6.26        |
|                  | PMB 2    | 4.35  | 5.56 | 4.83        | 5.85        | 5.01        | 6.00        | 4.95        | 5.81        | 4.23  | 7.02 | 4.48        | 5.95        | 4.61   | 6.12 | 4.67        | 6.22        |
| <b>ARU623</b>    | PMB 0    | 6.02  | 9.05 | 6.23        | 8.99        | 6.13        | 8.83        | 4.70        | 6.39        | 6.06  | 9.03 | 6.12        | 8.98        | 4.82   | 6.48 | 4.77        | 7.07        |
|                  | PMB 0.25 | 6.16  | 8.95 | 6.23        | 8.98        | <b>4.72</b> | <b>5.56</b> | 4.78        | 5.64        | 6.20  | 8.98 | 6.12        | 8.97        | 4.57   | 5.22 | 4.29        | 5.59        |
|                  | PMB 0.5  | 5.96  | 8.95 | 4.85        | 6.50        | 4.31        | 6.20        | 4.76        | 6.02        | 6.10  | 8.81 | 5.11        | 6.95        | 3.93   | 5.85 | 4.87        | 6.62        |
|                  | PMB 1    | 4.33  | 6.04 | 4.44        | 6.29        | 4.31        | 7.00        | 4.83        | 6.10        | 6.10  | 8.74 | 4.66        | 7.08        | 4.79   | 7.27 | 4.07        | 7.62        |
|                  | PMB 2    | 4.00  | 6.14 | 4.63        | 6.97        | 4.36        | 6.41        | 4.77        | 6.91        | 4.02  | 6.78 | 4.44        | 6.12        | 4.66   | 7.55 | 4.83        | 7.28        |
| <b>Aztreonam</b> |          | ATM 0 |      | ATM 2       |             | ATM 8       |             | ATM 64      |             | ATM 0 |      | ATM 2       |             | ATM 8  |      | ATM 64      |             |
| <b>ARU617</b>    | PMB 0    | 6.20  | 9.06 | 6.23        | 9.01        | 6.26        | 8.96        | 6.28        | 8.62        | 6.19  | 9.05 | 6.20        | 9.00        | 6.29   | 8.93 | 6.27        | 8.68        |
|                  | PMB 0.25 | 6.19  | 9.02 | 6.12        | 9.02        | 6.29        | 8.96        | 6.26        | 8.59        | 6.27  | 9.03 | 6.26        | 9.00        | 6.31   | 8.82 | 5.47        | 7.24        |
|                  | PMB 0.5  | 4.81  | 6.11 | 6.26        | 8.92        | 4.68        | 6.27        | 4.68        | 6.18        | 6.02  | 8.54 | 6.36        | 8.89        | 5.64   | 7.71 | <b>4.71</b> | <b>6.43</b> |
|                  | PMB 1    | 4.47  | 6.44 | 4.64        | 6.29        | 4.05        | 5.62        | 4.24        | 6.18        | 5.04  | 7.91 | 4.67        | 6.48        | 5.91   | 8.21 | 4.63        | 6.55        |
|                  | PMB 2    | 4.28  | 6.09 | 4.33        | 5.61        | 4.32        | 6.38        | 4.26        | 5.87        | 4.66  | 6.90 | 4.58        | 6.97        | 4.61   | 6.92 | 4.64        | 6.78        |
| <b>ARU620</b>    | PMB 0    | 6.02  | 8.99 | 6.25        | 8.99        | 6.14        | 9.00        | 5.92        | 8.00        | 6.07  | 9.07 | 6.24        | 9.01        | 6.06   | 7.81 | 6.03        | 8.05        |
|                  | PMB 0.25 | 6.20  | 8.98 | 6.20        | 8.98        | 6.01        | 9.01        | 5.38        | 5.69        | 6.08  | 9.02 | 6.24        | 8.98        | 5.32   | 7.01 | <b>5.23</b> | <b>6.26</b> |
|                  | PMB 0.5  | 5.90  | 8.77 | 4.83        | 5.85        | 4.83        | 6.38        | 4.92        | 6.54        | 5.10  | 8.65 | 4.63        | 6.57        | 5.00   | 6.62 | 5.15        | 7.00        |
|                  | PMB 1    | 4.50  | 7.76 | 4.69        | 6.96        | 4.65        | 7.74        | 4.82        | 8.02        | 4.85  | 7.41 | 5.72        | 8.63        | 5.01   | 8.19 | 4.91        | 8.27        |
|                  | PMB 2    | 4.33  | 8.09 | 4.83        | 7.71        | 4.30        | 8.37        | 4.52        | 8.15        | 4.70  | 8.44 | 4.84        | 8.60        | 4.85   | 8.70 | 4.98        | 8.61        |
| <b>ARU622</b>    | PMB 0    | 6.05  | 9.07 | 6.10        | 9.03        | 6.23        | 9.05        | 6.25        | 8.65        | 5.81  | 9.03 | 6.15        | 9.00        | 6.22   | 8.99 | 6.28        | 8.33        |
|                  | PMB 0.25 | 6.08  | 9.07 | 6.10        | 9.01        | 6.13        | 9.01        | <b>5.44</b> | <b>6.84</b> | 6.10  | 9.04 | 6.15        | 8.99        | 6.15   | 9.01 | <b>5.87</b> | <b>6.53</b> |
|                  | PMB 0.5  | 4.93  | 7.74 | 6.06        | 8.67        | 5.06        | 6.66        | 5.10        | 6.59        | 5.90  | 9.00 | 6.12        | 9.00        | 5.21   | 6.12 | 5.24        | 6.34        |
|                  | PMB 1    | 4.92  | 8.32 | 4.52        | 6.10        | 5.00        | 6.79        | 5.12        | 6.79        | 5.80  | 8.76 | 5.79        | 7.74        | 5.10   | 7.20 | 5.13        | 7.71        |
|                  | PMB 2    | 4.64  | 6.53 | 4.89        | 6.77        | 4.86        | 7.83        | 4.96        | 7.10        | 4.72  | 8.42 | 4.94        | 8.17        | 4.96   | 7.76 | 4.92        | 8.18        |
| <b>ARU623</b>    | PMB 0    | 6.02  | 8.99 | 6.25        | 8.99        | 6.14        | 9.00        | 5.92        | 8.00        | 6.18  | 8.99 | 6.15        | 8.98        | 6.20   | 8.93 | 5.89        | 8.13        |
|                  | PMB 0.25 | 6.20  | 8.98 | 6.20        | 8.98        | 6.01        | 9.01        | 5.38        | 5.69        | 5.99  | 9.02 | 6.17        | 8.96        | 6.07   | 8.94 | <b>5.43</b> | <b>5.94</b> |
|                  | PMB 0.5  | 5.90  | 8.77 | 4.83        | 5.85        | 4.83        | 6.38        | 4.92        | 6.54        | 4.97  | 7.52 | 5.78        | 8.38        | 4.88   | 6.06 | 4.93        | 6.41        |
|                  | PMB 1    | 4.50  | 7.76 | 4.69        | 6.96        | 4.65        | 7.74        | 4.82        | 8.02        | 4.58  | 6.72 | 4.61        | 7.10        | 4.76   | 7.39 | 4.79        | 7.81        |
|                  | PMB 2    | 4.33  | 8.09 | 4.83        | 7.71        | 4.30        | 8.37        | 4.52        | 8.15        | 4.48  | 8.31 | 4.80        | 8.60        | 4.23   | 8.57 | 4.59        | 8.21        |

## Supplementary data.

| <b>Cefepime</b>        |          | FEP 0     | FEP 2     | FEP 8     | FEP 64           | FEP 0     | FEP 2     | FEP 8            | FEP 64           |
|------------------------|----------|-----------|-----------|-----------|------------------|-----------|-----------|------------------|------------------|
| <b>ARU617</b>          | PMB 0    | 6.20 9.06 | 6.25 9.01 | 6.32 8.77 | 6.03 7.78        | 6.19 9.05 | 6.23 9.01 | 6.30 8.75        | 6.20 8.52        |
|                        | PMB 0.25 | 6.19 9.02 | 6.25 9.01 | 6.31 8.81 | 5.96 7.44        | 6.27 9.03 | 6.25 9.01 | 6.30 8.72        | 5.96 7.60        |
|                        | PMB 0.5  | 4.81 6.11 | 4.24 6.08 | 4.38 6.18 | 4.54 6.54        | 6.02 8.54 | 4.85 6.71 | 4.89 6.70        | <b>4.59 6.90</b> |
|                        | PMB 1    | 4.47 6.44 | 4.58 6.65 | 4.30 6.55 | 4.44 6.09        | 5.04 7.91 | 4.75 6.76 | 4.78 7.12        | 4.72 6.99        |
|                        | PMB 2    | 4.28 6.09 | 4.33 6.17 | 4.47 6.18 | 4.52 6.23        | 4.66 6.90 | 4.67 6.78 | 4.86 6.94        | 4.68 6.76        |
| <b>ARU620</b>          | PMB 0    | 6.02 8.99 | 6.17 9.00 | 6.15 9.06 | 5.96 8.20        | 6.07 9.07 | 6.28 8.98 | 6.17 8.29        | 6.06 7.83        |
|                        | PMB 0.25 | 6.20 8.98 | 6.03 8.99 | 6.09 8.75 | <b>5.49 7.17</b> | 6.08 9.02 | 6.29 8.97 | 5.24 7.37        | 5.20 7.19        |
|                        | PMB 0.5  | 5.90 8.77 | 4.62 7.42 | 4.99 7.77 | 4.59 7.49        | 5.10 8.65 | 6.10 8.65 | 5.15 8.04        | 5.08 7.94        |
|                        | PMB 1    | 4.50 7.76 | 4.45 7.91 | 4.45 7.93 | 4.79 7.81        | 4.85 7.41 | 5.03 8.47 | 4.95 8.18        | 5.05 8.17        |
|                        | PMB 2    | 4.33 8.09 | 4.59 8.10 | 4.23 7.93 | 4.64 7.61        | 4.70 8.44 | 5.01 8.51 | 4.99 8.11        | 4.91 8.00        |
| <b>ARU622</b>          | PMB 0    | 6.05 9.07 | 6.26 9.05 | 6.25 8.73 | 5.86 7.56        | 5.81 9.03 | 6.22 8.97 | 6.28 8.90        | 6.17 7.62        |
|                        | PMB 0.25 | 6.08 9.07 | 6.17 9.01 | 6.21 8.04 | 6.06 7.77        | 6.10 9.04 | 6.18 8.99 | 6.23 8.91        | 5.73 6.83        |
|                        | PMB 0.5  | 4.93 7.74 | 4.86 6.87 | 5.21 7.22 | 5.14 7.22        | 5.90 9.00 | 5.22 6.90 | <b>5.22 7.26</b> | 5.23 7.03        |
|                        | PMB 1    | 4.92 8.32 | 5.11 7.06 | 5.09 6.85 | 5.05 7.13        | 5.80 8.76 | 5.13 7.98 | 5.13 7.84        | 5.05 7.49        |
|                        | PMB 2    | 4.64 6.53 | 4.78 8.19 | 4.90 8.29 | 4.97 8.34        | 4.72 8.42 | 4.54 7.30 | 4.96 7.66        | 4.92 7.39        |
| <b>ARU623</b>          | PMB 0    | 6.02 8.99 | 6.17 9.00 | 6.15 9.06 | 5.96 8.20        | 6.18 8.99 | 6.12 8.98 | 6.25 8.90        | 5.91 8.27        |
|                        | PMB 0.25 | 6.20 8.98 | 6.03 8.99 | 6.09 8.75 | <b>5.49 7.17</b> | 5.99 9.02 | 6.16 8.96 | 5.59 6.87        | <b>5.17 6.74</b> |
|                        | PMB 0.5  | 5.90 8.77 | 4.62 7.42 | 4.99 7.77 | 4.59 7.49        | 4.97 7.52 | 4.77 7.00 | 4.59 6.78        | 4.91 7.41        |
|                        | PMB 1    | 4.50 7.76 | 4.45 7.91 | 4.45 7.93 | 4.79 7.81        | 4.58 6.72 | 4.81 8.19 | 4.72 7.88        | 4.73 7.74        |
|                        | PMB 2    | 4.33 8.09 | 4.59 8.10 | 4.23 7.93 | 4.64 7.61        | 4.48 8.31 | 4.11 8.06 | 4.66 7.24        | 4.49 7.64        |
| <b>Chloramphenicol</b> |          | CHL 0     | CHL 1     | CHL 8     | CHL 32           | CHL 0     | CHL 1     | CHL 8            | CHL 32           |
| <b>ARU617</b>          | PMB 0    | 6.17 9.02 | 6.23 9.03 | 6.24 9.01 | 6.20 9.00        | 6.19 9.02 | 6.26 9.01 | 6.27 9.01        | 6.28 8.98        |
|                        | PMB 0.25 | 6.22 9.02 | 6.20 9.03 | 6.21 9.02 | 6.24 9.00        | 6.19 9.04 | 6.24 9.00 | 6.24 9.00        | 6.27 8.96        |
|                        | PMB 0.5  | 4.03 5.06 | 4.33 7.50 | 4.46 7.25 | 4.33 6.94        | 4.74 6.78 | 4.50 6.19 | 4.53 6.13        | 4.74 6.31        |
|                        | PMB 1    | 4.34 5.55 | 4.27 6.56 | 3.89 6.95 | 4.11 6.48        | 3.93 6.39 | 4.37 6.10 | 4.61 6.31        | 4.57 6.41        |
|                        | PMB 2    | 4.17 5.90 | 4.22 6.85 | 4.30 6.61 | 4.18 5.81        | 4.41 7.20 | 4.23 6.20 | 4.47 6.48        | 4.38 6.39        |
| <b>ARU620</b>          | PMB 0    | 5.91 9.07 | 6.07 9.07 | 6.07 9.07 | 6.09 9.05        | 5.99 9.02 | 6.16 9.00 | 6.16 8.99        | 6.14 9.06        |
|                        | PMB 0.25 | 5.95 9.07 | 6.10 8.99 | 6.13 8.98 | 6.26 8.89        | 6.05 9.02 | 6.13 9.00 | 6.18 8.98        | 6.16 9.04        |
|                        | PMB 0.5  | 5.00 6.74 | 5.17 6.45 | 5.10 6.29 | 5.18 6.46        | 6.17 9.07 | 5.49 7.19 | 5.53 6.98        | <b>5.55 6.71</b> |
|                        | PMB 1    | 4.80 5.99 | 5.17 6.45 | 5.04 6.76 | 4.77 6.13        | 5.20 6.82 | 5.40 7.21 | 5.36 6.80        | 5.26 6.89        |
|                        | PMB 2    | 4.78 6.37 | 5.02 6.69 | 4.94 6.51 | 4.84 6.41        | 5.19 7.80 | 5.26 6.31 | 5.30 7.04        | 5.42 6.64        |
| <b>ARU622</b>          | PMB 0    | 6.08 9.01 | 6.12 9.01 | 6.14 9.01 | 6.19 8.99        | 6.09 9.07 | 6.12 9.02 | 6.11 9.01        | 6.12 9.06        |
|                        | PMB 0.25 | 6.09 9.03 | 6.12 9.01 | 6.16 9.00 | 6.15 8.98        | 6.11 9.07 | 6.03 9.02 | 6.11 9.02        | 6.19 8.99        |
|                        | PMB 0.5  | 5.07 6.18 | 5.28 6.08 | 6.31 8.85 | 5.23 6.34        | 4.79 6.64 | 4.87 6.92 | 4.81 6.74        | 4.86 6.36        |
|                        | PMB 1    | 5.37 7.16 | 5.20 5.88 | 5.04 6.04 | 5.04 6.46        | 4.57 6.05 | 4.43 6.59 | 4.59 6.55        | 4.69 6.43        |
|                        | PMB 2    | 4.35 5.56 | 4.83 5.92 | 4.75 5.76 | 4.58 6.33        | 4.23 7.02 | 4.37 6.38 | 4.62 6.99        | 4.61 6.17        |
| <b>ARU623</b>          | PMB 0    | 6.02 9.05 | 6.27 8.93 | 6.19 8.93 | 6.13 8.97        | 6.06 9.03 | 6.23 8.98 | 6.26 8.96        | 6.24 8.96        |
|                        | PMB 0.25 | 6.16 8.95 | 6.26 8.93 | 6.27 8.92 | 6.26 8.95        | 6.20 8.98 | 6.21 8.98 | 6.26 8.96        | 6.18 8.96        |
|                        | PMB 0.5  | 5.96 8.95 | 5.02 6.65 | 4.93 6.33 | <b>4.81 6.42</b> | 6.10 8.81 | 4.58 6.76 | 4.99 7.58        | <b>5.06 7.27</b> |
|                        | PMB 1    | 4.33 6.04 | 4.80 7.12 | 4.68 6.39 | 4.63 6.30        | 6.10 8.74 | 4.90 7.69 | 4.86 6.79        | 4.88 6.54        |
|                        | PMB 2    | 4.00 6.14 | 4.50 7.29 | 4.73 6.46 | 5.91 8.22        | 4.02 6.78 | 4.67 7.00 | 4.82 6.70        | 4.74 6.26        |

## Supplementary data.

| <b>Ciprofloxacin</b> |          | CIP 0 |      | CIP 0.25 |      | CIP 2       |             | CIP 8       |             | CIP 0 |      | CIP 0.25 |      | CIP 2  |      | CIP 8       |             |
|----------------------|----------|-------|------|----------|------|-------------|-------------|-------------|-------------|-------|------|----------|------|--------|------|-------------|-------------|
| <b>ARU617</b>        | PMB 0    | 6.17  | 9.02 | 4.08     | 7.33 | 6.27        | 8.62        | 4.85        | 7.74        | 6.19  | 9.02 | 6.21     | 9.03 | 6.11   | 8.05 | 5.36        | 6.82        |
|                      | PMB 0.25 | 6.22  | 9.02 | 6.21     | 9.02 | 6.28        | 8.61        | 4.99        | 7.89        | 6.19  | 9.04 | 6.22     | 9.01 | 6.29   | 8.57 | 4.76        | 6.01        |
|                      | PMB 0.5  | 4.03  | 5.06 | 4.49     | 7.07 | 4.52        | 7.22        | 4.42        | 7.60        | 4.74  | 6.78 | 6.30     | 8.59 | 4.77   | 6.60 | 4.63        | 6.72        |
|                      | PMB 1    | 4.34  | 5.55 | 4.45     | 6.70 | 4.48        | 6.66        | 3.99        | 7.00        | 3.93  | 6.39 | 4.24     | 5.51 | 3.96   | 6.12 | 4.54        | 6.67        |
|                      | PMB 2    | 4.17  | 5.90 | 4.16     | 6.32 | 6.20        | 8.69        | 4.28        | 6.55        | 4.41  | 7.20 | 4.76     | 6.49 | 4.59   | 6.33 | 4.38        | 6.17        |
| <b>ARU620</b>        | PMB 0    | 5.91  | 9.07 | 6.09     | 9.07 | 6.07        | 9.06        | 5.78        | 8.02        | 5.99  | 9.02 | 6.18     | 9.00 | 6.28   | 8.95 | 5.91        | 7.73        |
|                      | PMB 0.25 | 5.95  | 9.07 | 6.10     | 9.00 | 6.26        | 8.95        | 5.39        | 6.66        | 6.05  | 9.02 | 6.11     | 9.01 | 6.27   | 8.95 | 6.07        | 8.02        |
|                      | PMB 0.5  | 5.00  | 6.74 | 4.97     | 5.36 | 5.17        | 6.28        | 5.20        | 6.43        | 6.17  | 9.07 | 6.16     | 9.00 | 6.17   | 8.95 | 6.12        | 8.41        |
|                      | PMB 1    | 4.80  | 5.99 | 5.02     | 6.53 | 4.93        | 6.52        | 5.00        | 6.41        | 5.20  | 6.82 | 5.30     | 6.87 | 5.39   | 6.94 | 5.38        | 7.02        |
|                      | PMB 2    | 4.78  | 6.37 | 4.90     | 6.44 | 4.98        | 6.24        | 4.92        | 6.78        | 5.19  | 7.80 | 5.28     | 6.71 | 5.36   | 6.83 | 5.28        | 6.96        |
| <b>ARU622</b>        | PMB 0    | 6.08  | 9.01 | 6.17     | 9.01 | 6.27        | 8.92        | 6.16        | 8.94        | 6.09  | 9.07 | 6.11     | 9.07 | 6.15   | 9.02 | 5.57        | 7.01        |
|                      | PMB 0.25 | 6.09  | 9.03 | 6.17     | 9.00 | 6.28        | 8.89        | 6.28        | 8.87        | 6.11  | 9.07 | 6.14     | 9.01 | 6.29   | 8.88 | 6.04        | 8.84        |
|                      | PMB 0.5  | 5.07  | 6.18 | 4.80     | 6.41 | 5.13        | 6.02        | 5.20        | 6.18        | 4.79  | 6.64 | 4.76     | 6.80 | 4.70   | 6.50 | 4.88        | 6.93        |
|                      | PMB 1    | 5.37  | 7.16 | 5.06     | 6.21 | 5.07        | 6.02        | 5.02        | 6.01        | 4.57  | 6.05 | 4.63     | 6.27 | 4.71   | 6.22 | 4.26        | 6.33        |
|                      | PMB 2    | 4.35  | 5.56 | 4.91     | 6.03 | 4.93        | 6.08        | 4.99        | 6.23        | 4.23  | 7.02 | 4.57     | 6.52 | 4.68   | 6.66 | 4.43        | 6.86        |
| <b>ARU623</b>        | PMB 0    | 6.02  | 9.05 | 6.26     | 8.89 | 6.07        | 8.51        | 5.22        | 7.46        | 6.06  | 9.03 | 6.23     | 8.97 | 6.24   | 8.92 | 5.37        | 7.99        |
|                      | PMB 0.25 | 6.16  | 8.95 | 6.27     | 8.90 | <b>5.12</b> | <b>6.87</b> | 5.10        | 6.64        | 6.20  | 8.98 | 6.26     | 8.96 | 6.17   | 8.92 | 5.31        | 7.06        |
|                      | PMB 0.5  | 5.96  | 8.95 | 4.96     | 6.59 | 4.61        | 6.48        | 5.01        | 7.24        | 6.10  | 8.81 | 5.05     | 7.32 | 5.05   | 7.01 | 5.10        | 7.23        |
|                      | PMB 1    | 4.33  | 6.04 | 4.79     | 6.86 | 4.82        | 7.01        | 4.77        | 7.08        | 6.10  | 8.74 | 4.85     | 7.21 | 4.79   | 7.31 | 4.81        | 7.45        |
|                      | PMB 2    | 4.00  | 6.14 | 4.60     | 5.95 | 4.82        | 6.72        | 4.61        | 6.66        | 4.02  | 6.78 | 4.58     | 6.53 | 4.24   | 6.90 | 4.81        | 7.11        |
| <b>Fosfomycin</b>    |          | FOF 0 |      | FOF 8    |      | FOF 32      |             | FOF 128     |             | FOF 0 |      | FOF 8    |      | FOF 32 |      | FOF 128     |             |
| <b>ARU617</b>        | PMB 0    | 6.26  | 9.04 | 6.28     | 8.71 | 6.32        | 8.70        | 6.15        | 8.21        | 6.26  | 9.02 | 6.31     | 8.67 | 6.30   | 8.39 | 6.27        | 8.40        |
|                      | PMB 0.25 | 6.23  | 9.04 | 6.29     | 8.74 | 6.30        | 8.83        | 5.64        | 7.67        | 6.24  | 9.02 | 6.31     | 8.64 | 6.15   | 8.23 | 6.15        | 8.33        |
|                      | PMB 0.5  | 6.28  | 8.99 | 6.32     | 8.85 | 4.85        | 6.79        | <b>4.52</b> | <b>6.99</b> | 6.30  | 8.80 | 4.91     | 7.34 | 4.83   | 6.88 | <b>5.02</b> | <b>7.57</b> |
|                      | PMB 1    | 4.65  | 7.09 | 4.50     | 6.91 | 4.39        | 7.28        | 4.60        | 7.22        | 4.81  | 6.86 | 5.06     | 7.79 | 4.92   | 6.72 | 5.06        | 7.64        |
|                      | PMB 2    | 3.92  | 5.95 | 4.54     | 6.22 | 4.68        | 6.67        | 4.46        | 7.02        | 4.41  | 7.15 | 5.04     | 7.36 | 4.79   | 6.60 | 4.87        | 7.25        |
| <b>ARU620</b>        | PMB 0    | 6.04  | 9.07 | 6.17     | 8.99 | 5.81        | 7.92        | 6.07        | 9.07        | 6.06  | 9.04 | 6.19     | 8.99 | 6.22   | 8.77 | 5.90        | 8.38        |
|                      | PMB 0.25 | 6.13  | 9.03 | 6.16     | 9.07 | 6.02        | 9.00        | <b>5.11</b> | <b>6.99</b> | 6.10  | 9.01 | 6.16     | 8.98 | 6.12   | 8.62 | <b>5.36</b> | <b>7.72</b> |
|                      | PMB 0.5  | 6.15  | 8.86 | 4.83     | 7.41 | 4.78        | 6.86        | 4.48        | 8.12        | 6.17  | 8.99 | 5.16     | 7.47 | 5.12   | 7.57 | 5.03        | 7.97        |
|                      | PMB 1    | 4.62  | 8.63 | 4.71     | 7.59 | 4.58        | 7.25        | 4.46        | 8.56        | 4.98  | 7.54 | 4.88     | 8.04 | 5.02   | 7.78 | 4.86        | 8.69        |
|                      | PMB 2    | 4.70  | 6.92 | 4.64     | 7.68 | 4.43        | 7.23        | 4.39        | 8.51        | 4.82  | 6.61 | 4.88     | 6.56 | 5.05   | 7.98 | 4.83        | 8.71        |
| <b>ARU622</b>        | PMB 0    | 6.14  | 8.99 | 6.25     | 8.97 | 6.14        | 8.97        | 6.15        | 8.98        | 6.11  | 9.02 | 6.03     | 9.01 | 6.16   | 9.00 | 6.14        | 9.00        |
|                      | PMB 0.25 | 6.25  | 8.98 | 6.16     | 8.97 | 6.16        | 8.98        | 6.13        | 8.94        | 6.08  | 9.03 | 5.96     | 9.01 | 6.22   | 8.95 | 6.11        | 8.99        |
|                      | PMB 0.5  | 6.12  | 9.00 | 5.10     | 6.91 | 6.11        | 8.95        | <b>5.01</b> | <b>6.95</b> | 6.12  | 9.03 | 6.05     | 9.01 | 4.73   | 8.32 | <b>4.92</b> | <b>8.35</b> |
|                      | PMB 1    | 6.10  | 8.81 | 5.10     | 7.16 | 4.80        | 7.28        | 4.86        | 6.96        | 4.83  | 8.48 | 4.63     | 8.50 | 4.72   | 8.61 | 4.91        | 8.59        |
|                      | PMB 2    | 6.13  | 8.55 | 4.82     | 6.82 | 4.83        | 6.97        | 4.79        | 6.69        | 4.64  | 8.42 | 4.71     | 8.60 | 4.70   | 8.45 | 4.63        | 8.45        |
| <b>ARU623</b>        | PMB 0    | 6.10  | 9.02 | 6.23     | 8.97 | 6.14        | 8.97        | 6.16        | 8.99        | 6.17  | 9.00 | 6.17     | 8.99 | 6.09   | 9.00 | 6.00        | 9.01        |
|                      | PMB 0.25 | 6.22  | 8.98 | 6.08     | 9.00 | 6.05        | 9.01        | 5.95        | 9.02        | 6.25  | 9.00 | 6.13     | 8.98 | 6.16   | 8.99 | <b>4.93</b> | <b>8.65</b> |
|                      | PMB 0.5  | 5.22  | 6.76 | 4.93     | 6.66 | 4.88        | 6.35        | 4.82        | 7.18        | 4.39  | 7.97 | 4.46     | 8.67 | 4.54   | 8.75 | 4.57        | 8.74        |
|                      | PMB 1    | 4.78  | 8.47 | 4.83     | 6.81 | 4.91        | 6.91        | 4.70        | 7.54        | 4.73  | 8.73 | 4.72     | 8.69 | 4.58   | 8.78 | 4.62        | 8.80        |
|                      | PMB 2    | 4.74  | 6.15 | 4.61     | 6.80 | 4.75        | 7.58        | 4.70        | 6.98        | 4.65  | 8.30 | 4.55     | 8.70 | 4.53   | 8.76 | 4.32        | 8.82        |

Supplementary data.

| <b>Linezolid</b> |          | LIN 0     | LIN 2     | LIN 8            | LIN 16           | LIN 0     | LIN 2     | LIN 8            | LIN 16           |
|------------------|----------|-----------|-----------|------------------|------------------|-----------|-----------|------------------|------------------|
| <b>ARU617</b>    | PMB 0    | 6.23 9.02 | 6.25 9.01 | 6.28 9.05        | 6.26 9.01        | 6.24 9.06 | 6.25 9.01 | 6.26 9.06        | 6.27 9.06        |
|                  | PMB 0.25 | 6.21 9.02 | 6.27 9.01 | 6.28 9.01        | 6.27 9.01        | 6.24 9.01 | 6.29 9.00 | 6.27 9.01        | 6.27 9.01        |
|                  | PMB 0.5  | 6.29 9.00 | 6.25 9.01 | 6.28 9.00        | 6.27 9.01        | 6.28 8.89 | 6.29 8.89 | 6.30 8.87        | 6.29 8.87        |
|                  | PMB 1    | 4.85 6.37 | 5.22 6.37 | 4.98 6.79        | 6.27 8.51        | 4.95 7.23 | 5.12 8.04 | 5.02 7.65        | 4.96 7.35        |
|                  | PMB 2    | 4.43 6.24 | 5.08 6.69 | 4.90 6.72        | 4.92 6.73        | 4.53 7.07 | 4.86 7.72 | 4.83 7.45        | 4.73 7.33        |
| <b>ARU620</b>    | PMB 0    | 5.91 9.07 | 6.07 9.07 | 6.18 9.00        | 6.09 9.07        | 5.93 9.01 | 5.99 9.01 | 5.97 9.00        | 6.01 9.01        |
|                  | PMB 0.25 | 6.06 9.01 | 6.19 8.99 | 6.18 8.99        | 6.03 9.07        | 5.79 9.00 | 6.09 9.00 | 6.06 8.99        | 5.98 8.99        |
|                  | PMB 0.5  | 6.12 9.07 | 6.15 9.00 | 6.15 9.00        | 6.18 8.99        | 6.08 9.00 | 5.85 9.07 | <b>4.97 6.75</b> | 5.98 9.00        |
|                  | PMB 1    | 5.08 6.64 | 5.11 7.27 | 5.05 7.43        | 4.96 6.72        | 4.93 6.02 | 4.41 5.51 | 5.22 6.19        | 6.06 8.98        |
|                  | PMB 2    | 4.86 6.98 | 4.94 6.72 | 5.06 7.73        | 4.82 6.58        | 5.05 7.33 | 5.07 6.51 | 4.89 6.27        | 5.03 6.29        |
| <b>ARU622</b>    | PMB 0    | 6.09 9.08 | 6.14 9.07 | 6.12 9.07        | 6.12 9.08        | 6.08 9.03 | 6.01 9.02 | 5.98 9.07        | 6.11 9.02        |
|                  | PMB 0.25 | 6.11 9.07 | 6.16 9.01 | 6.09 9.07        | 6.09 9.02        | 6.08 9.03 | 5.99 9.01 | 5.97 9.01        | 6.10 9.01        |
|                  | PMB 0.5  | 6.12 9.07 | 6.10 9.07 | 6.02 9.07        | <b>6.12 9.07</b> | 6.03 9.07 | 6.09 9.01 | 6.01 9.01        | <b>6.06 8.99</b> |
|                  | PMB 1    | 6.07 9.07 | 5.00 7.70 | 5.84 8.03        | 5.09 6.92        | 5.99 8.75 | 6.08 8.43 | 5.98 8.30        | 5.18 7.18        |
|                  | PMB 2    | 4.70 7.80 | 4.97 7.99 | 4.82 6.90        | 4.89 7.41        | 4.90 6.34 | 5.04 6.45 | 5.73 7.26        | 4.69 6.09        |
| <b>ARU623</b>    | PMB 0    | 6.13 9.04 | 6.07 9.05 | 6.15 9.05        | 6.10 9.06        | 5.97 9.06 | 6.15 9.07 | 6.15 9.06        | 6.11 9.06        |
|                  | PMB 0.25 | 6.11 9.05 | 6.01 9.04 | 6.14 9.03        | 6.09 9.03        | 6.03 9.06 | 6.20 8.97 | 6.11 8.97        | 6.12 9.06        |
|                  | PMB 0.5  | 6.13 9.05 | 6.15 9.04 | 6.13 9.04        | 6.10 9.03        | 5.22 7.21 | 5.96 8.78 | 4.88 5.84        | 6.12 8.82        |
|                  | PMB 1    | 4.93 7.64 | 5.95 8.18 | 4.88 6.73        | 4.92 6.71        | 4.52 6.20 | 4.72 6.51 | 5.29 7.92        | 4.86 6.47        |
|                  | PMB 2    | 4.85 7.14 | 4.75 7.44 | 4.72 7.34        | 4.70 7.24        | 4.68 6.17 | 4.70 6.44 | 4.57 6.53        | 4.57 5.97        |
| <b>Meropenem</b> |          | MEM 0     | MEM 2     | MEM 16           | MEM 64           | MEM 0     | MEM 2     | MEM 16           | MEM 64           |
| <b>ARU617</b>    | PMB 0    | 6.19 9.02 | 5.93 7.93 | 5.73 7.58        | 5.69 8.11        | 6.21 9.03 | 5.75 7.72 | 6.11 8.38        | 5.45 8.32        |
|                  | PMB 0.25 | 6.19 9.04 | 4.93 8.58 | 4.88 6.81        | 4.35 7.06        | 6.18 9.03 | 5.28 6.88 | 4.58 5.98        | 4.49 5.86        |
|                  | PMB 0.5  | 4.74 6.78 | 4.07 7.87 | 3.75 6.06        | 4.62 7.13        | 6.21 8.85 | 4.35 5.06 | 4.01 6.04        | 4.16 7.08        |
|                  | PMB 1    | 3.93 6.39 | 4.31 6.49 | 3.93 6.17        | 4.21 7.51        | 4.03 8.04 | 4.10 7.60 | 4.44 7.21        | 3.78 8.30        |
|                  | PMB 2    | 4.41 7.20 | 3.87 4.79 | 4.38 6.07        | 4.49 6.61        | 4.24 8.56 | 4.01 6.32 | 4.11 8.47        | 3.94 8.50        |
| <b>ARU620</b>    | PMB 0    | 5.91 9.07 | 6.12 9.07 | 5.62 7.43        | 5.45 8.37        | 5.99 9.02 | 6.27 8.97 | 6.07 8.09        | 5.73 8.47        |
|                  | PMB 0.25 | 5.95 9.07 | 6.08 9.07 | 5.24 7.20        | 5.21 7.42        | 6.05 9.02 | 6.16 9.00 | <b>5.51 7.85</b> | 5.43 7.89        |
|                  | PMB 0.5  | 5.00 6.74 | 4.96 7.00 | 5.02 6.74        | 5.02 7.23        | 6.17 9.07 | 5.36 6.99 | 5.32 8.11        | 5.30 7.73        |
|                  | PMB 1    | 4.80 5.99 | 4.98 6.59 | 4.92 6.25        | 4.96 7.22        | 5.20 6.82 | 5.22 7.06 | 5.19 6.71        | 5.25 7.99        |
|                  | PMB 2    | 4.78 6.37 | 4.78 7.04 | 4.79 7.01        | 4.88 6.79        | 5.19 7.80 | 5.16 6.51 | 5.18 6.22        | 5.29 7.73        |
| <b>ARU622</b>    | PMB 0    | 6.08 9.01 | 6.15 9.01 | 6.23 8.97        | 5.80 7.77        | 6.10 9.08 | 6.08 9.08 | 6.21 9.06        | 6.19 8.45        |
|                  | PMB 0.25 | 6.09 9.03 | 6.14 9.07 | 6.21 8.97        | 5.07 5.99        | 6.03 9.08 | 5.94 9.02 | 6.20 8.94        | <b>5.73 7.87</b> |
|                  | PMB 0.5  | 5.07 6.18 | 6.13 8.98 | 5.33 6.55        | 5.08 6.28        | 5.90 9.04 | 6.15 9.00 | 4.87 7.32        | 4.90 8.17        |
|                  | PMB 1    | 5.37 7.16 | 4.48 5.92 | 4.85 5.83        | 4.80 5.96        | 5.90 8.81 | 5.31 8.13 | 4.86 7.22        | 4.84 8.56        |
|                  | PMB 2    | 4.35 5.56 | 4.76 5.74 | 4.34 5.49        | 4.76 5.66        | 4.74 8.34 | 4.87 7.54 | 4.70 7.62        | 4.90 7.98        |
| <b>ARU623</b>    | PMB 0    | 6.02 9.05 | 6.27 8.94 | 6.11 8.96        | 5.18 7.81        | 6.06 9.03 | 6.22 8.98 | 6.33 8.95        | 5.28 8.53        |
|                  | PMB 0.25 | 6.16 8.95 | 6.28 8.95 | <b>4.82 7.28</b> | 4.92 6.95        | 6.20 8.98 | 6.14 9.03 | <b>5.01 6.93</b> | 5.07 7.01        |
|                  | PMB 0.5  | 5.96 8.95 | 4.61 8.09 | 4.79 8.22        | 4.77 8.24        | 6.10 8.81 | 4.46 7.05 | 4.89 6.50        | 4.98 6.78        |
|                  | PMB 1    | 4.33 6.04 | 4.51 6.52 | 4.57 6.19        | 4.69 8.37        | 6.10 8.74 | 4.78 6.29 | 4.81 5.89        | 4.82 7.34        |
|                  | PMB 2    | 4.00 6.14 | 3.92 8.39 | 3.79 7.36        | 4.40 7.34        | 4.02 6.78 | 4.36 6.18 | 4.13 6.05        | 4.47 7.34        |

## Supplementary data.

| <b>Minocycline</b> |          | MIN 0 | MIN 0.5 | MIN 4  | MIN 16 | MIN 0 | MIN 0.5 | MIN 4       | MIN 16      |      |      |      |      |      |      |             |             |
|--------------------|----------|-------|---------|--------|--------|-------|---------|-------------|-------------|------|------|------|------|------|------|-------------|-------------|
| <b>ARU617</b>      | PMB 0    | 6.17  | 9.02    | 6.23   | 9.02   | 6.25  | 9.01    | 6.24        | 8.91        | 6.19 | 9.02 | 6.27 | 9.04 | 6.25 | 9.04 | 6.29        | 8.98        |
|                    | PMB 0.25 | 6.22  | 9.02    | 6.24   | 9.02   | 6.22  | 9.02    | 6.20        | 8.84        | 6.19 | 9.04 | 6.25 | 9.04 | 6.28 | 9.03 | <b>4.39</b> | <b>7.36</b> |
|                    | PMB 0.5  | 4.03  | 5.06    | 4.66   | 6.62   | 4.34  | 6.14    | 4.36        | 6.83        | 4.74 | 6.78 | 4.42 | 6.65 | 4.57 | 7.00 | 4.63        | 7.08        |
|                    | PMB 1    | 4.34  | 5.55    | 4.06   | 6.04   | 4.23  | 5.93    | 4.27        | 6.28        | 3.93 | 6.39 | 4.25 | 6.44 | 4.30 | 7.01 | 4.78        | 7.53        |
|                    | PMB 2    | 4.17  | 5.90    | 4.10   | 5.73   | 3.81  | 5.40    | 4.13        | 6.03        | 4.41 | 7.20 | 4.34 | 6.10 | 4.49 | 6.19 | 4.32        | 7.90        |
| <b>ARU620</b>      | PMB 0    | 5.91  | 9.07    | 6.06   | 9.07   | 6.11  | 9.07    | 6.16        | 8.83        | 5.99 | 9.02 | 6.07 | 9.01 | 6.17 | 8.99 | 6.15        | 8.48        |
|                    | PMB 0.25 | 5.95  | 9.07    | 6.04   | 9.06   | 6.05  | 9.07    | <b>5.15</b> | <b>6.73</b> | 6.05 | 9.02 | 6.08 | 9.01 | 5.99 | 9.07 | <b>5.51</b> | <b>7.28</b> |
|                    | PMB 0.5  | 5.00  | 6.74    | 5.15   | 6.90   | 5.09  | 6.90    | 5.07        | 6.75        | 6.17 | 9.07 | 5.46 | 6.93 | 5.44 | 6.90 | 5.48        | 7.29        |
|                    | PMB 1    | 4.80  | 5.99    | 4.95   | 6.50   | 5.02  | 6.45    | 4.86        | 6.60        | 5.20 | 6.82 | 5.36 | 7.28 | 5.33 | 7.27 | 5.40        | 7.42        |
|                    | PMB 2    | 4.78  | 6.37    | 4.95   | 6.47   | 4.92  | 6.12    | 4.84        | 6.59        | 5.19 | 7.80 | 5.28 | 7.88 | 5.25 | 7.32 | 5.21        | 7.99        |
| <b>ARU622</b>      | PMB 0    | 6.08  | 9.01    | 6.10   | 9.01   | 6.19  | 9.01    | 6.22        | 8.97        | 6.09 | 9.07 | 6.11 | 9.07 | 6.15 | 9.07 | 6.12        | 9.07        |
|                    | PMB 0.25 | 6.09  | 9.03    | 6.08   | 9.02   | 6.22  | 9.00    | 6.16        | 8.96        | 6.11 | 9.07 | 6.11 | 9.07 | 6.14 | 9.07 | <b>4.90</b> | <b>6.84</b> |
|                    | PMB 0.5  | 5.07  | 6.18    | 6.29   | 8.99   | 6.30  | 8.68    | 5.09        | 6.13        | 4.79 | 6.64 | 4.89 | 6.66 | 4.88 | 6.48 | 4.71        | 6.29        |
|                    | PMB 1    | 5.37  | 7.16    | 5.04   | 6.52   | 4.97  | 6.09    | 4.88        | 6.14        | 4.57 | 6.05 | 4.21 | 6.76 | 4.61 | 5.93 | 4.34        | 5.66        |
|                    | PMB 2    | 4.35  | 5.56    | 4.62   | 6.08   | 4.59  | 5.62    | 4.75        | 5.94        | 4.23 | 7.02 | 4.31 | 6.57 | 4.29 | 5.56 | 4.44        | 6.33        |
| <b>ARU623</b>      | PMB 0    | 6.02  | 9.05    | 6.26   | 8.93   | 6.25  | 8.94    | 6.12        | 8.91        | 6.06 | 9.03 | 6.24 | 8.97 | 6.28 | 8.98 | 6.18        | 8.71        |
|                    | PMB 0.25 | 6.16  | 8.95    | 6.27   | 8.93   | 6.31  | 8.94    | <b>4.94</b> | <b>7.46</b> | 6.20 | 8.98 | 6.00 | 9.03 | 6.26 | 8.98 | <b>5.08</b> | <b>6.62</b> |
|                    | PMB 0.5  | 5.96  | 8.95    | 4.97   | 6.51   | 4.93  | 7.10    | 4.88        | 6.93        | 6.10 | 8.81 | 4.74 | 6.80 | 5.04 | 6.41 | 5.09        | 6.54        |
|                    | PMB 1    | 4.33  | 6.04    | 4.63   | 6.90   | 4.68  | 7.73    | 4.74        | 7.06        | 6.10 | 8.74 | 4.52 | 7.08 | 4.83 | 6.41 | 4.76        | 7.48        |
|                    | PMB 2    | 4.00  | 6.14    | 4.44   | 6.57   | 5.10  | 7.59    | 4.50        | 7.62        | 4.02 | 6.78 | 4.39 | 6.92 | 4.26 | 6.14 | 4.09        | 7.57        |
| <b>Temocillin</b>  |          | TMC 0 | TMC 4   | TMC 16 | TMC 64 | TMC 0 | TMC 4   | TMC 16      | TMC 64      |      |      |      |      |      |      |             |             |
| <b>ARU617</b>      | PMB 0    | 6.11  | 9.07    | 6.24   | 9.07   | 6.23  | 9.07    | 6.19        | 9.07        | 6.19 | 9.05 | 6.23 | 9.03 | 6.25 | 9.03 | 6.25        | 9.02        |
|                    | PMB 0.25 | 6.20  | 9.04    | 6.18   | 9.05   | 6.17  | 9.06    | 6.06        | 9.01        | 6.27 | 9.03 | 6.27 | 9.02 | 6.24 | 9.03 | 6.28        | 9.02        |
|                    | PMB 0.5  | 6.27  | 8.92    | 6.22   | 8.62   | 6.24  | 8.87    | 6.11        | 8.76        | 6.02 | 8.54 | 6.31 | 8.71 | 6.33 | 8.88 | 6.28        | 8.87        |
|                    | PMB 1    | 3.96  | 8.24    | 4.47   | 8.63   | 6.22  | 8.65    | 4.18        | 7.43        | 5.04 | 7.91 | 4.92 | 6.67 | 4.77 | 6.42 | 4.62        | 6.97        |
|                    | PMB 2    | 4.06  | 8.57    | 4.21   | 8.70   | 4.11  | 8.59    | 4.24        | 7.64        | 4.66 | 6.90 | 4.71 | 7.71 | 4.77 | 7.62 | 4.63        | 7.47        |
| <b>ARU620</b>      | PMB 0    | 6.02  | 8.99    | 6.24   | 8.99   | 6.18  | 9.01    | 6.13        | 9.01        | 6.07 | 9.07 | 6.10 | 9.01 | 6.13 | 9.02 | 6.09        | 9.03        |
|                    | PMB 0.25 | 6.20  | 8.98    | 6.14   | 9.00   | 6.08  | 9.02    | 6.22        | 8.98        | 6.08 | 9.02 | 6.09 | 9.06 | 6.02 | 9.07 | 5.98        | 9.07        |
|                    | PMB 0.5  | 5.90  | 8.77    | 6.16   | 8.75   | 6.10  | 8.83    | <b>5.05</b> | <b>6.65</b> | 5.10 | 8.65 | 5.99 | 8.98 | 5.11 | 6.59 | 5.07        | 6.40        |
|                    | PMB 1    | 4.50  | 7.76    | 3.97   | 5.63   | 4.67  | 5.95    | 4.18        | 5.61        | 4.85 | 7.41 | 4.86 | 6.67 | 4.98 | 6.35 | 5.04        | 6.26        |
|                    | PMB 2    | 4.33  | 8.09    | 3.95   | 4.98   | 4.22  | 7.89    | 4.69        | 7.78        | 4.70 | 8.44 | 4.67 | 8.68 | 4.51 | 8.64 | 4.55        | 8.58        |
| <b>ARU622</b>      | PMB 0    | 5.87  | 9.08    | 6.09   | 9.02   | 6.12  | 9.02    | 6.06        | 9.08        | 5.81 | 9.03 | 6.11 | 9.03 | 6.10 | 9.03 | 6.09        | 9.04        |
|                    | PMB 0.25 | 6.03  | 9.03    | 6.07   | 9.07   | 6.08  | 9.07    | 6.09        | 9.01        | 6.10 | 9.04 | 6.07 | 9.07 | 6.10 | 9.03 | 6.10        | 9.03        |
|                    | PMB 0.5  | 6.03  | 9.01    | 6.10   | 9.00   | 6.10  | 9.01    | 6.05        | 9.00        | 5.90 | 9.00 | 5.94 | 8.98 | 6.07 | 9.05 | <b>5.24</b> | <b>8.58</b> |
|                    | PMB 1    | 4.78  | 7.79    | 6.09   | 8.19   | 4.96  | 6.84    | 5.98        | 8.91        | 5.80 | 8.76 | 5.63 | 8.70 | 6.03 | 8.77 | 6.02        | 8.89        |
|                    | PMB 2    | 4.92  | 6.76    | 5.32   | 6.38   | 5.62  | 7.63    | 5.44        | 7.51        | 4.72 | 8.42 | 4.72 | 8.71 | 4.67 | 8.12 | 5.04        | 8.52        |
| <b>ARU623</b>      | PMB 0    | 6.02  | 8.99    | 6.24   | 8.99   | 6.18  | 9.01    | 6.13        | 9.01        | 6.18 | 8.99 | 6.18 | 9.00 | 6.15 | 9.01 | 6.05        | 9.02        |
|                    | PMB 0.25 | 6.20  | 8.98    | 6.14   | 9.00   | 6.08  | 9.02    | 6.22        | 8.98        | 5.99 | 9.02 | 6.09 | 9.04 | 6.01 | 9.00 | 6.11        | 9.01        |
|                    | PMB 0.5  | 5.90  | 8.77    | 6.16   | 8.75   | 6.10  | 8.83    | <b>5.05</b> | <b>6.65</b> | 4.97 | 7.52 | 6.02 | 8.85 | 4.81 | 8.70 | 4.91        | 7.13        |
|                    | PMB 1    | 4.50  | 7.76    | 3.97   | 5.63   | 4.67  | 5.95    | 4.18        | 5.61        | 4.58 | 6.72 | 4.55 | 7.41 | 5.12 | 8.76 | 4.62        | 8.63        |
|                    | PMB 2    | 4.33  | 8.09    | 3.95   | 4.98   | 4.22  | 7.89    | 4.69        | 7.78        | 4.48 | 8.31 | 4.31 | 8.78 | 4.33 | 8.75 | 4.90        | 8.65        |

## Supplementary data.

| Thiamphenicol |          | THI 0 |      | THI 2 |      | THI 8 |      | THI 32      |             | THI 0 |      | THI 2 |      | THI 8       |             | THI 32      |             |
|---------------|----------|-------|------|-------|------|-------|------|-------------|-------------|-------|------|-------|------|-------------|-------------|-------------|-------------|
| ARU617        | PMB 0    | 6.20  | 9.06 | 6.23  | 9.06 | 6.23  | 9.06 | 6.24        | 9.07        | 6.25  | 9.02 | 6.13  | 9.06 | 6.27        | 9.01        | 6.28        | 8.96        |
|               | PMB 0.25 | 6.19  | 9.02 | 6.19  | 9.01 | 6.25  | 9.00 | 6.24        | 9.04        | 6.22  | 9.06 | 6.21  | 9.00 | 6.28        | 8.98        | 6.27        | 8.92        |
|               | PMB 0.5  | 4.81  | 6.11 | 6.29  | 8.87 | 6.31  | 8.94 | 5.70        | 7.81        | 6.28  | 8.47 | 6.19  | 8.65 | 4.27        | 5.84        | <b>4.63</b> | <b>6.02</b> |
|               | PMB 1    | 4.47  | 6.44 | 4.43  | 6.57 | 4.20  | 6.10 | 4.56        | 6.42        | 4.36  | 6.50 | 5.85  | 7.70 | 4.59        | 5.88        | 3.81        | 6.09        |
|               | PMB 2    | 4.28  | 6.09 | 4.52  | 6.68 | 4.12  | 5.81 | 4.09        | 5.90        | 4.32  | 7.28 | 4.63  | 6.43 | 4.41        | 6.33        | 4.12        | 6.24        |
| ARU620        | PMB 0    | 6.02  | 8.99 | 6.24  | 8.98 | 6.16  | 9.05 | 6.07        | 8.97        | 6.07  | 9.07 | 6.09  | 9.01 | 6.14        | 8.99        | 6.22        | 8.97        |
|               | PMB 0.25 | 6.20  | 8.98 | 6.12  | 9.03 | 6.20  | 8.95 | 6.24        | 8.95        | 6.08  | 9.02 | 5.98  | 9.01 | 6.13        | 8.99        | 6.25        | 8.95        |
|               | PMB 0.5  | 5.90  | 8.77 | 4.77  | 5.87 | 4.87  | 7.02 | <b>4.96</b> | <b>6.58</b> | 5.10  | 8.65 | 6.01  | 9.07 | 5.21        | 7.64        | 5.14        | 8.79        |
|               | PMB 1    | 4.50  | 7.76 | 5.79  | 8.13 | 4.59  | 6.88 | 4.45        | 7.30        | 4.85  | 7.41 | 5.00  | 6.42 | 5.03        | 6.43        | 5.05        | 6.72        |
|               | PMB 2    | 4.33  | 8.09 | 4.53  | 7.53 | 4.83  | 7.18 | 4.72        | 7.28        | 4.70  | 8.44 | 4.64  | 8.46 | 4.77        | 8.12        | 4.60        | 8.11        |
| ARU622        | PMB 0    | 5.93  | 9.03 | 6.15  | 9.01 | 6.15  | 9.01 | 6.13        | 8.98        | 5.81  | 9.03 | 6.12  | 9.03 | 6.08        | 9.03        | 6.11        | 9.01        |
|               | PMB 0.25 | 6.10  | 9.02 | 5.90  | 9.07 | 6.09  | 9.07 | 6.04        | 9.06        | 6.10  | 9.04 | 6.07  | 9.03 | 6.09        | 9.07        | 6.04        | 9.00        |
|               | PMB 0.5  | 6.12  | 9.01 | 6.09  | 8.98 | 5.87  | 9.00 | 6.06        | 8.97        | 5.90  | 9.00 | 6.06  | 8.90 | 5.65        | 8.06        | <b>5.34</b> | <b>7.64</b> |
|               | PMB 1    | 4.96  | 6.37 | 6.07  | 8.36 | 5.02  | 6.58 | 5.19        | 6.89        | 5.80  | 8.76 | 5.80  | 8.01 | 5.02        | 7.32        | 5.05        | 6.90        |
|               | PMB 2    | 4.80  | 6.10 | 4.70  | 6.22 | 4.83  | 6.59 | 4.96        | 6.66        | 4.72  | 8.42 | 4.85  | 7.62 | 4.83        | 8.04        | 4.99        | 7.37        |
| ARU623        | PMB 0    | 6.02  | 8.99 | 6.24  | 8.98 | 6.16  | 9.05 | 6.07        | 8.97        | 6.18  | 8.99 | 6.12  | 9.02 | 5.99        | 9.05        | 6.08        | 9.04        |
|               | PMB 0.25 | 6.20  | 8.98 | 6.12  | 9.03 | 6.20  | 8.95 | 6.24        | 8.95        | 5.99  | 9.02 | 6.10  | 9.04 | 6.09        | 9.05        | 6.13        | 8.97        |
|               | PMB 0.5  | 5.90  | 8.77 | 4.77  | 5.87 | 4.87  | 7.02 | <b>4.96</b> | <b>6.58</b> | 4.97  | 7.52 | 4.69  | 6.66 | 4.93        | 6.84        | 4.84        | 7.64        |
|               | PMB 1    | 4.50  | 7.76 | 5.79  | 8.13 | 4.59  | 6.88 | 4.45        | 7.30        | 4.58  | 6.72 | 4.65  | 8.09 | 4.67        | 7.57        | 4.79        | 7.81        |
|               | PMB 2    | 4.33  | 8.09 | 4.53  | 7.53 | 4.83  | 7.18 | 4.72        | 7.28        | 4.48  | 8.31 | 4.55  | 8.57 | 4.69        | 7.68        | 4.43        | 7.66        |
| Trimethoprim  |          | TMP 0 |      | TMP 1 |      | TMP 4 |      | TMP 8       |             | TMP 0 |      | TMP 1 |      | TMP 4       |             | TMP 8       |             |
| ARU617        | PMB 0    | 6.20  | 9.06 | 6.20  | 9.06 | 6.23  | 9.06 | 6.09        | 9.06        | 6.21  | 9.07 | 6.25  | 9.06 | 6.25        | 9.03        | 6.26        | 9.03        |
|               | PMB 0.25 | 6.19  | 9.02 | 6.20  | 9.02 | 6.13  | 9.01 | 6.18        | 9.06        | 6.23  | 9.05 | 6.21  | 9.01 | 6.22        | 9.04        | 6.01        | 9.05        |
|               | PMB 0.5  | 4.81  | 6.11 | 6.32  | 8.92 | 6.31  | 8.91 | 6.31        | 8.75        | 6.24  | 8.83 | 4.09  | 6.21 | <b>4.00</b> | <b>6.51</b> | 6.28        | 8.74        |
|               | PMB 1    | 4.47  | 6.44 | 4.59  | 6.35 | 6.27  | 8.75 | 4.48        | 6.50        | 4.17  | 8.66 | 4.46  | 6.59 | 4.03        | 7.96        | 3.68        | 7.76        |
|               | PMB 2    | 4.28  | 6.09 | 4.37  | 6.30 | 4.20  | 6.11 | 4.26        | 6.42        | 4.60  | 7.75 | 4.44  | 8.66 | 4.19        | 8.63        | 4.13        | 8.59        |
| ARU620        | PMB 0    | 6.02  | 8.99 | 6.13  | 9.01 | 6.15  | 9.01 | 6.16        | 9.01        | 6.07  | 9.07 | 6.09  | 9.07 | 6.08        | 9.07        | 6.10        | 9.07        |
|               | PMB 0.25 | 6.20  | 8.98 | 6.24  | 8.98 | 6.26  | 8.98 | 6.11        | 8.99        | 6.08  | 9.02 | 6.08  | 9.01 | 6.07        | 9.01        | 6.10        | 9.01        |
|               | PMB 0.5  | 5.90  | 8.77 | 4.94  | 6.60 | 4.95  | 6.18 | <b>4.78</b> | <b>6.38</b> | 5.10  | 8.65 | 5.21  | 6.40 | 5.19        | 6.38        | 5.17        | 7.05        |
|               | PMB 1    | 4.50  | 7.76 | 4.70  | 7.16 | 4.21  | 5.86 | 4.70        | 7.65        | 4.85  | 7.41 | 5.03  | 7.35 | 5.07        | 7.65        | 5.01        | 8.40        |
|               | PMB 2    | 4.33  | 8.09 | 4.50  | 7.35 | 4.71  | 7.49 | 4.60        | 8.06        | 4.70  | 8.44 | 4.79  | 7.85 | 4.62        | 8.33        | 4.50        | 8.48        |
| ARU622        | PMB 0    | 5.81  | 9.03 | 6.13  | 9.07 | 6.12  | 9.07 | 6.04        | 9.05        | 5.97  | 9.08 | 5.82  | 9.04 | 6.00        | 9.08        | 5.94        | 9.08        |
|               | PMB 0.25 | 6.10  | 9.04 | 6.11  | 9.03 | 6.11  | 9.03 | 6.00        | 9.03        | 5.99  | 9.04 | 6.02  | 9.07 | 6.10        | 9.07        | 6.12        | 9.07        |
|               | PMB 0.5  | 5.90  | 9.00 | 6.04  | 8.84 | 5.86  | 7.89 | <b>5.13</b> | <b>7.85</b> | 5.91  | 9.07 | 6.08  | 8.93 | 5.00        | 8.40        | <b>4.57</b> | <b>8.42</b> |
|               | PMB 1    | 5.80  | 8.76 | 5.97  | 8.56 | 4.95  | 6.72 | 4.91        | 8.24        | 5.95  | 9.05 | 6.02  | 8.72 | 6.13        | 8.96        | 4.92        | 7.64        |
|               | PMB 2    | 4.72  | 8.42 | 4.72  | 7.51 | 5.07  | 7.03 | 4.68        | 8.11        | 4.17  | 8.77 | 4.80  | 8.72 | 4.82        | 8.71        | 4.71        | 8.67        |
| ARU623        | PMB 0    | 6.02  | 8.99 | 6.13  | 9.01 | 6.15  | 9.01 | 6.16        | 9.01        | 6.18  | 8.99 | 6.20  | 8.99 | 6.13        | 9.02        | 6.11        | 9.01        |
|               | PMB 0.25 | 6.20  | 8.98 | 6.24  | 8.98 | 6.26  | 8.98 | 6.11        | 8.99        | 5.99  | 9.02 | 6.11  | 9.02 | 6.11        | 9.03        | 6.06        | 9.04        |
|               | PMB 0.5  | 5.90  | 8.77 | 4.94  | 6.60 | 4.95  | 6.18 | <b>4.78</b> | <b>6.38</b> | 4.97  | 7.52 | 4.85  | 7.45 | 6.27        | 8.56        | 4.92        | 7.76        |
|               | PMB 1    | 4.50  | 7.76 | 4.70  | 7.16 | 4.21  | 5.86 | 4.70        | 7.65        | 4.58  | 6.72 | 4.67  | 7.99 | 4.76        | 7.96        | 4.73        | 7.03        |
|               | PMB 2    | 4.33  | 8.09 | 4.50  | 7.35 | 4.71  | 7.49 | 4.60        | 8.06        | 4.48  | 8.31 | 4.02  | 7.92 | 4.89        | 8.04        | 4.50        | 8.49        |

Supplementary data.

| <b>Rifampicin</b> |          | RIF 0 |      | RIF 1 |      | RIF 8       |             | RIF 32 |      | RIF 0 |      | RIF 1 |      | RIF 8       |             | RIF 32 |      |
|-------------------|----------|-------|------|-------|------|-------------|-------------|--------|------|-------|------|-------|------|-------------|-------------|--------|------|
| <b>ARU617</b>     | PMB 0    | 6.17  | 9.02 | 6.20  | 9.02 | 6.27        | 8.98        | 4.42   | 4.20 | 6.19  | 9.02 | 6.27  | 9.05 | 6.28        | 8.88        | 5.31   | 5.04 |
|                   | PMB 0.25 | 6.22  | 9.02 | 6.23  | 9.01 | 6.29        | 8.97        | 4.95   | 5.59 | 6.19  | 9.04 | 6.23  | 9.05 | 6.30        | 8.87        | 4.66   | 5.79 |
|                   | PMB 0.5  | 4.03  | 5.06 | 4.62  | 6.64 | 4.54        | 5.84        | 4.12   | 5.62 | 4.74  | 6.78 | 4.39  | 6.32 | 4.06        | 5.26        | 4.27   | 4.93 |
|                   | PMB 1    | 4.34  | 5.55 | 3.80  | 6.16 | 4.01        | 5.40        | 4.14   | 5.65 | 3.93  | 6.39 | 4.01  | 6.28 | 4.38        | 6.03        | 4.12   | 5.58 |
|                   | PMB 2    | 4.17  | 5.90 | 3.75  | 5.72 | 4.29        | 5.82        | 3.74   | 4.96 | 4.41  | 7.20 | 4.04  | 6.32 | 4.74        | 6.15        | 4.07   | 4.98 |
| <b>ARU620</b>     | PMB 0    | 5.91  | 9.07 | 6.05  | 9.07 | 6.01        | 9.06        | 5.29   | 5.38 | 5.99  | 9.02 | 6.07  | 9.02 | 6.12        | 9.00        | 5.28   | 5.58 |
|                   | PMB 0.25 | 5.95  | 9.07 | 6.01  | 9.07 | 5.98        | 9.07        | 5.01   | 5.49 | 6.05  | 9.02 | 6.05  | 9.07 | 6.02        | 9.07        | 5.52   | 5.80 |
|                   | PMB 0.5  | 5.00  | 6.74 | 5.09  | 6.80 | 5.05        | 6.09        | 4.93   | 5.06 | 6.17  | 9.07 | 5.40  | 6.55 | <b>5.41</b> | <b>6.06</b> | 5.23   | 6.01 |
|                   | PMB 1    | 4.80  | 5.99 | 4.85  | 6.08 | 4.94        | 5.98        | 4.82   | 5.64 | 5.20  | 6.82 | 5.30  | 6.98 | 5.33        | 6.39        | 5.27   | 5.87 |
|                   | PMB 2    | 4.78  | 6.37 | 4.80  | 6.06 | 4.52        | 5.51        | 4.67   | 5.32 | 5.19  | 7.80 | 5.28  | 7.41 | 5.10        | 5.67        | 4.97   | 5.69 |
| <b>ARU622</b>     | PMB 0    | 6.08  | 9.01 | 6.09  | 9.02 | 6.18        | 9.01        | 5.54   | 5.80 | 6.09  | 9.07 | 6.02  | 9.07 | 6.10        | 9.04        | 5.42   | 5.36 |
|                   | PMB 0.25 | 6.09  | 9.03 | 6.11  | 9.07 | 6.25        | 8.97        | 5.09   | 6.63 | 6.11  | 9.07 | 6.05  | 9.07 | 6.13        | 9.05        | 4.99   | 5.94 |
|                   | PMB 0.5  | 5.07  | 6.18 | 5.11  | 6.44 | 5.12        | 6.03        | 4.94   | 5.63 | 4.79  | 6.64 | 4.82  | 6.80 | 4.86        | 6.05        | 4.34   | 5.82 |
|                   | PMB 1    | 5.37  | 7.16 | 4.96  | 6.23 | 4.82        | 6.04        | 4.79   | 5.74 | 4.57  | 6.05 | 4.52  | 6.40 | 4.13        | 5.78        | 4.46   | 5.88 |
|                   | PMB 2    | 4.35  | 5.56 | 4.33  | 5.54 | 4.36        | 5.50        | 4.33   | 5.33 | 4.23  | 7.02 | 4.30  | 6.58 | 4.13        | 5.39        | 4.24   | 5.76 |
| <b>ARU623</b>     | PMB 0    | 6.02  | 9.05 | 6.18  | 8.94 | 6.23        | 8.75        | 4.70   | 5.30 | 6.06  | 9.03 | 6.25  | 8.97 | 6.23        | 8.86        | 5.43   | 5.64 |
|                   | PMB 0.25 | 6.16  | 8.95 | 6.25  | 8.92 | <b>5.73</b> | <b>7.52</b> | 4.79   | 5.89 | 6.20  | 8.98 | 6.24  | 8.97 | <b>5.61</b> | <b>7.14</b> | 5.19   | 5.73 |
|                   | PMB 0.5  | 5.96  | 8.95 | 4.86  | 6.87 | 4.81        | 5.70        | 4.52   | 5.32 | 6.10  | 8.81 | 5.10  | 6.25 | 5.15        | 5.83        | 4.94   | 5.33 |
|                   | PMB 1    | 4.33  | 6.04 | 4.41  | 6.57 | 4.55        | 5.69        | 4.51   | 5.56 | 6.10  | 8.74 | 4.69  | 6.64 | 5.02        | 5.53        | 4.82   | 5.50 |
|                   | PMB 2    | 4.00  | 6.14 | 4.46  | 6.59 | 4.16        | 5.55        | 4.11   | 5.62 | 4.02  | 6.78 | 4.44  | 6.80 | 4.17        | 5.10        | 4.67   | 5.62 |

Abbreviations: AMK, amikacin; ATM, aztreonam; FEP, cefepime; CHL, chloramphenicol; CIP, ciprofloxacin; FOF, fosfomicin; LIN, linezolid; MEM meropenem; MIN, minocycline; PMB, polymyxin B; RIF, rifampicin; TMC, temocillin; THI, thiamphenicol; TMP, trimethoprim.



## Supplementary data

**Table S2.** Results of static time-kill experiments. Mean bacterial concentrations in log<sub>10</sub> CFU/mL (standard deviations) at 0, 3, 6 and 24 hours, change in bacterial concentrations ( $\Delta$ ) compared to the starting inoculum, and combination interactions (Int), i.e. difference in bacterial concentrations with the combination compared to the most active single antibiotic, are presented. Synergy is highlighted in dark grey, additive effects in light grey and a bactericidal activity is marked in bold.

| Strain             | Antibiotics       | 0h          | 3h           | $\Delta_{3h}$ | Int <sub>3h</sub> | 6h           | $\Delta_{6h}$ | Int <sub>6h</sub> | 24h         | $\Delta_{24h}$ | Int <sub>24h</sub> |
|--------------------|-------------------|-------------|--------------|---------------|-------------------|--------------|---------------|-------------------|-------------|----------------|--------------------|
| ARU617             | PMB 0.5           | 6.55 (0.16) | 2.04 (0.00)  | <b>-4.13</b>  |                   | 4.51 (0.36)  | -1.66         |                   | 7.97 (0.96) | 1.80           |                    |
|                    | ATM 64            | 6.44 (0.16) | 5.50 (0.24)  | -0.67         |                   | 6.56 (0.04)  | 0.39          |                   | 8.69 (0.08) | 2.52           |                    |
|                    | PMB 0.5 + ATM 64  | 6.46 (0.23) | 1.00 (0.00)  | <b>-6.17</b>  | -2.04             | 1.69 (1.19)  | <b>-4.48</b>  | -2.82             | 1.50 (0.00) | <b>-6.17</b>   | -7.97              |
|                    | Control           | 6.47 (0.22) | 7.98 (0.08)  | 1.81          |                   | 8.91 (0.02)  | 2.74          |                   | 9.70 (0.07) | 3.53           |                    |
|                    | PMB 0.5           | 6.55 (0.16) | 4.08 (0.00)  | -2.09         |                   | 4.51 (0.36)  | -1.66         |                   | 7.97 (0.96) | 1.80           |                    |
|                    | FEP 64            | 6.52 (0.23) | 5.07 (1.18)  | -1.10         |                   | 4.37 (0.18)  | -1.80         |                   | 5.21 (0.50) | -0.96          |                    |
|                    | PMB 0.5 + FEP 64  | 6.54 (0.18) | 3.85 (0.59)  | -2.32         | -0.23             | 2.89 (1.42)  | <b>-3.28</b>  | -1.48             | 2.69 (0.62) | <b>-3.48</b>   | -2.52              |
|                    | Control           | 6.47 (0.22) | 7.98 (0.08)  | 1.81          |                   | 8.91 (0.02)  | 2.74          |                   | 9.70 (0.07) | 3.53           |                    |
|                    | PMB 0.5           | 7.01 (0.04) | 1.59 (0.11)  | <b>-4.58</b>  |                   | 2.37 (0.04)  | <b>-3.80</b>  |                   | 8.90 (0.18) | 2.73           |                    |
|                    | FOF 128           | 6.55 (0.24) | 4.42 (0.08)  | -1.75         |                   | 3.67 (0.34)  | -2.50         |                   | 9.55 (0.04) | 3.38           |                    |
|                    | PMB 0.5 + FOF 128 | 6.44 (0.14) | 2.41 (0.71)  | <b>-3.76</b>  | 0.82              | 2.07 (1.57)  | <b>-4.10</b>  | -0.30             | 3.26 (1.05) | -2.91          | -5.64              |
|                    | Control           | 6.47 (0.22) | 7.98 (0.08)  | 1.81          |                   | 8.91 (0.02)  | 2.74          |                   | 9.70 (0.07) | 3.53           |                    |
|                    | PMB 0.25          | 6.50 (0.02) | 6.60 (0.04)  | 0.43          |                   | 7.94 (0.00)  | 1.77          |                   | 9.67 (0.12) | 3.50           |                    |
|                    | MIN 16            | 6.53 (0.03) | 6.64 (0.11)  | 0.47          |                   | 5.98 (0.31)  | -0.19         |                   | 7.41 (0.75) | 1.24           |                    |
|                    | PMB 0.25 + MIN 16 | 6.53 (0.02) | 1.24 (0.24)  | <b>-4.93</b>  | -5.36             | 1.00 (0.00)  | <b>-5.17</b>  | -4.98             | 2.71 (1.71) | <b>-3.46</b>   | -4.70              |
|                    | Control           | 6.52 (0.02) | 7.97 (0.05)  | 1.80          |                   | 8.77 (0.01)  | 2.60          |                   | 9.69 (0.19) | 3.52           |                    |
| PMB 0.5            | 6.42 (0.16)       | 7.36 (0.22) | 1.19         |               | 8.52 (0.09)       | 2.35         |               | 9.70 (0.09)       | 3.53        |                |                    |
| THI 32             | 6.47 (0.24)       | 7.89 (0.01) | 1.72         |               | 8.30 (0.29)       | 2.13         |               | 8.78 (0.13)       | 2.61        |                |                    |
| PMB 0.5 + THI 32   | 6.23 (0.07)       | 6.53 (0.31) | 0.36         | -0.83         | 7.60 (0.36)       | 1.43         | -0.70         | 8.52 (0.16)       | 2.35        | -0.26          |                    |
| Control            | 6.38 (0.18)       | 7.80 (0.08) | 1.63         |               | 8.70 (0.05)       | 2.53         |               | 9.59 (0.07)       | 3.42        |                |                    |
| PMB 0.5            | 6.42 (0.16)       | 7.36 (0.22) | 1.19         |               | 8.52 (0.09)       | 2.35         |               | 9.70 (0.09)       | 3.53        |                |                    |
| TMP 4              | 6.47 (0.21)       | 7.85 (0.22) | 1.68         |               | 8.37 (0.32)       | 2.20         |               | 9.75 (0.01)       | 3.58        |                |                    |
| PMB 0.5 + TMP 4    | 6.37 (0.13)       | 6.71 (0.31) | 0.54         | -0.65         | 8.01 (0.23)       | 1.84         | -0.36         | 9.70 (0.08)       | 3.53        | 0.00           |                    |
| Control            | 6.38 (0.18)       | 7.80 (0.08) | 1.63         |               | 8.70 (0.05)       | 2.53         |               | 9.59 (0.07)       | 3.42        |                |                    |
| ARU620             | PMB 0.25          | 6.17 (0.00) | 5.91 (0.64)  | -0.26         |                   | 7.33 (0.15)  | 1.16          |                   | 9.47 (0.17) | 3.30           |                    |
|                    | AMK 4             | 6.22 (0.09) | 6.64 (0.90)  | 0.47          |                   | 3.76 (0.00)  | -2.41         |                   | 9.08 (0.21) | 2.91           |                    |
|                    | PMB 0.25 + AMK 4  | 6.09 (0.08) | 3.21 (0.00)  | -2.96         | -2.70             | 3.69 (0.00)  | -2.48         | -0.07             | 8.13 (1.05) | 1.96           | -0.95              |
|                    | Control           | 6.15 (0.06) | 7.50 (0.04)  | 1.33          |                   | 8.55 (0.15)  | 2.38          |                   | 9.46 (0.07) | 3.29           |                    |
|                    | PMB 0.25          | 5.75 (0.04) | 3.17 (1.27)  | <b>-3.00</b>  |                   | 4.14 (1.39)  | -2.03         |                   | 9.17 (0.15) | 3.00           |                    |
|                    | ATM 64            | 5.83 (0.05) | 3.72 (0.76)  | <b>-2.45</b>  |                   | 3.00 (0.00)  | <b>-3.17</b>  |                   | 5.13 (0.42) | -1.04          |                    |
|                    | PMB 0.25 + ATM 64 | 5.87 (0.00) | 1.50 (0.50)  | <b>-5.67</b>  | -2.67             | 1.00 (0.00)  | <b>-6.17</b>  | -3.00             | 1.20 (1.70) | <b>-4.97</b>   | -3.93              |
|                    | Control           | 5.85 (0.05) | 7.64 (0.04)  | 1.47          |                   | 8.63 (0.06)  | 2.46          |                   | 9.72 (0.03) | 3.55           |                    |
|                    | PMB 0.25          | 5.75 (0.04) | 3.17 (1.27)  | <b>-3.00</b>  |                   | 4.14 (1.39)  | -2.03         |                   | 9.17 (0.15) | 3.00           |                    |
|                    | FEP 64            | 5.83 (0.10) | 1.43 (1.43)  | <b>-4.74</b>  |                   | 3.45 (0.05)  | -2.72         |                   | 5.17 (0.50) | -1.00          |                    |
|                    | PMB 0.25 + FEP 64 | 5.76 (0.06) | 1.00 (0.00)  | <b>-6.17</b>  | -1.43             | 1.00 (0.00)  | <b>-6.17</b>  | -3.45             | 1.39 (0.89) | <b>-4.78</b>   | -3.78              |
|                    | Control           | 5.85 (0.05) | 7.64 (0.04)  | 1.47          |                   | 8.63 (0.06)  | 2.46          |                   | 9.72 (0.03) | 3.55           |                    |
|                    | PMB 0.5           | 6.01 (0.02) | 2.52 (1.22)  | <b>-3.65</b>  |                   | 1.71 (0.71)  | <b>-4.46</b>  |                   | 6.93 (2.10) | 0.76           |                    |
|                    | CHL 32            | 6.06 (0.01) | 7.28 (0.11)  | 1.11          |                   | 7.82 (0.03)  | 1.65          |                   | 9.06 (0.23) | 2.89           |                    |
|                    | PMB 0.5 + CHL 32  | 6.08 (0.09) | 1.00 (0.00)  | <b>-5.17</b>  | -1.52             | 1.00 (0.00)  | <b>-5.17</b>  | -0.71             | 1.00 (0.00) | <b>-5.17</b>   | -5.93              |
|                    | Control           | 6.11 (0.01) | 7.67 (0.09)  | 1.50          |                   | 8.47 (0.07)  | 2.30          |                   | 9.52 (0.01) | 3.35           |                    |
| PMB 0.25           | 5.75 (0.04)       | 3.17 (1.27) | <b>-3.00</b> |               | 4.14 (1.39)       | -2.03        |               | 9.17 (0.15)       | 3.00        |                |                    |
| FOF 128            | 5.86 (0.11)       | 5.12 (0.16) | -1.05        |               | 5.18 (0.22)       | -0.99        |               | 9.30 (0.02)       | 3.13        |                |                    |
| PMB 0.25 + FOF 128 | 5.77 (0.07)       | 3.28 (0.28) | -2.89        | 0.11          | 2.72 (0.65)       | <b>-3.45</b> | -1.42         | 9.15 (0.20)       | 2.98        | -0.01          |                    |
| Control            | 5.85 (0.05)       | 7.64 (0.04) | 1.47         |               | 8.63 (0.06)       | 2.46         |               | 9.72 (0.03)       | 3.55        |                |                    |
| PMB 0.5            | 5.88 (0.05)       | 5.15 (0.95) | -1.02        |               | 5.98 (1.78)       | -0.19        |               | 9.26 (0.44)       | 3.09        |                |                    |
| LIN 8              | 5.97 (0.15)       | 7.49 (0.05) | 1.32         |               | 8.56 (0.02)       | 2.39         |               | 9.59 (0.09)       | 3.42        |                |                    |
| PMB 0.5 + LIN 8    | 6.06 (0.12)       | 5.45 (1.00) | -0.72        | 0.30          | 6.60 (1.40)       | 0.43         | 0.62          | 9.53 (0.14)       | 3.36        | 0.27           |                    |
| Control            | 5.97 (0.13)       | 7.56 (0.22) | 1.39         |               | 8.53 (0.12)       | 2.36         |               | 9.67 (0.05)       | 3.50        |                |                    |

Supplementary data

| Strain            | Antibiotics       | 0h          | 3h           | $\Delta_{3h}$ | Int <sub>3h</sub> | 6h           | $\Delta_{6h}$ | Int <sub>6h</sub> | 24h          | $\Delta_{24h}$ | Int <sub>24h</sub> |
|-------------------|-------------------|-------------|--------------|---------------|-------------------|--------------|---------------|-------------------|--------------|----------------|--------------------|
| ARU620            | PMB 0.25          | 6.17 (0.00) | 5.91 (0.64)  | -0.26         |                   | 7.33 (0.15)  | 1.16          |                   | 9.47 (0.17)  | 3.30           |                    |
|                   | MEM 16            | 6.18 (0.02) | 1.88 (1.38)  | <b>-4.29</b>  |                   | 3.28 (0.24)  | -2.89         |                   | 5.48 (0.02)  | -0.69          |                    |
|                   | PMB 0.25 + MEM 16 | 6.22 (0.02) | 1.74 (0.26)  | <b>-4.43</b>  | -0.14             | 1.50 (0.00)  | <b>-5.67</b>  | <b>-2.78</b>      | 3.18 (0.00)  | -2.99          | <b>-2.29</b>       |
|                   | Control           | 6.15 (0.06) | 7.50 (0.04)  | 1.33          |                   | 8.55 (0.15)  | 2.38          |                   | 9.46 (0.07)  | 3.29           |                    |
|                   | PMB 0.25          | 6.17 (0.00) | 5.91 (0.64)  | -0.26         |                   | 7.33 (0.15)  | 1.16          |                   | 9.47 (0.17)  | 3.30           |                    |
|                   | MIN 16            | 6.19 (0.12) | 6.93 (0.26)  | 0.76          |                   | 7.86 (0.24)  | 1.69          |                   | 8.97 (0.03)  | 2.80           |                    |
|                   | PMB 0.25 + MIN 16 | 6.18 (0.02) | 3.34 (1.34)  | -2.83         | <b>-2.57</b>      | 3.59 (1.55)  | -2.58         | <b>-3.74</b>      | 8.35 (0.00)  | 2.18           | -0.62              |
|                   | Control           | 6.15 (0.06) | 7.50 (0.04)  | 1.33          |                   | 8.55 (0.15)  | 2.38          |                   | 9.46 (0.07)  | 3.29           |                    |
|                   | PMB 0.5           | 6.01 (0.02) | 2.52 (1.22)  | <b>-3.65</b>  |                   | 1.71 (0.71)  | <b>-4.46</b>  |                   | 6.93 (2.10)  | 0.76           |                    |
|                   | RIF 8             | 6.12 (0.01) | 7.47 (0.00)  | 1.30          |                   | 8.11 (0.15)  | 1.94          |                   | 8.72 (0.11)  | 2.55           |                    |
|                   | PMB 0.5 + RIF 8   | 6.00 (0.10) | 1.00 (0.00)  | <b>-5.17</b>  | <b>-1.52</b>      | 1.00 (0.00)  | <b>-5.17</b>  | -0.71             | 1.00 (0.00)  | <b>-5.17</b>   | <b>-5.93</b>       |
|                   | Control           | 6.11 (0.01) | 7.67 (0.09)  | 1.50          |                   | 8.47 (0.07)  | 2.30          |                   | 9.52 (0.01)  | 3.35           |                    |
|                   | PMB 0.5           | 5.88 (0.05) | 5.15 (0.95)  | -1.02         |                   | 5.98 (1.78)  | -0.19         |                   | 9.26 (0.44)  | 3.09           |                    |
|                   | TMC 64            | 6.00 (0.00) | 7.27 (0.18)  | 1.10          |                   | 8.00 (0.03)  | 1.83          |                   | 8.98 (0.05)  | 2.81           |                    |
|                   | PMB 0.5 + TMC 64  | 6.11 (0.10) | 4.39 (0.04)  | -1.78         | -0.76             | 5.92 (0.80)  | -0.25         | -0.06             | 8.72 (0.25)  | 2.55           | -0.27              |
|                   | Control           | 5.97 (0.13) | 7.56 (0.22)  | 1.39          |                   | 8.53 (0.12)  | 2.36          |                   | 9.67 (0.05)  | 3.50           |                    |
|                   | PMB 0.5           | 5.88 (0.05) | 5.15 (0.95)  | -1.02         |                   | 5.98 (1.78)  | -0.19         |                   | 9.26 (0.44)  | 3.09           |                    |
|                   | THI 32            | 6.15 (0.16) | 7.35 (0.09)  | 1.18          |                   | 8.14 (0.26)  | 1.97          |                   | 8.87 (0.09)  | 2.70           |                    |
|                   | PMB 0.5 + THI 32  | 6.04 (0.11) | 3.95 (1.54)  | -2.22         | <b>-1.20</b>      | 5.23 (1.67)  | -0.94         | -0.75             | 7.06 (2.01)  | 0.89           | <b>-1.81</b>       |
|                   | Control           | 5.97 (0.13) | 7.56 (0.22)  | 1.39          |                   | 8.53 (0.12)  | 2.36          |                   | 9.67 (0.05)  | 3.50           |                    |
|                   | PMB 0.5           | 5.88 (0.05) | 5.15 (0.95)  | -1.02         |                   | 5.98 (1.78)  | -0.19         |                   | 9.26 (0.44)  | 3.09           |                    |
|                   | TMP 8             | 5.94 (0.11) | 7.51 (0.19)  | 1.34          |                   | 8.58 (0.13)  | 2.41          |                   | 9.53 (0.06)  | 3.36           |                    |
|                   | PMB 0.5 + TMP 8   | 5.92 (0.20) | 5.00 (1.49)  | -1.17         | -0.15             | 6.42 (1.52)  | 0.25          | 0.44              | 9.40 (0.10)  | 3.23           | 0.14               |
|                   | Control           | 5.97 (0.13) | 7.56 (0.22)  | 1.39          |                   | 8.53 (0.12)  | 2.36          |                   | 9.67 (0.05)  | 3.50           |                    |
|                   | PMB 0.25          | 6.36 (0.01) | 7.58 (0.00)  | 1.41          |                   | 8.57 (0.04)  | 2.40          |                   | 9.83 (0.20)  | 3.66           |                    |
|                   | ATM 64            | 6.34 (0.04) | 5.37 (0.10)  | -0.80         |                   | 5.13 (0.62)  | -1.04         |                   | 6.02 (0.07)  | -0.15          |                    |
|                   | PMB 0.25 + ATM 64 | 6.27 (0.10) | 4.37 (0.07)  | -1.80         | <b>-1.00</b>      | 4.26 (0.22)  | -1.91         | -0.87             | 5.64 (0.17)  | -0.53          | -0.38              |
|                   | Control           | 6.37 (0.10) | 7.98 (0.09)  | 1.81          |                   | 8.68 (0.03)  | 2.51          |                   | 9.92 (0.18)  | 3.75           |                    |
|                   | PMB 0.5           | 6.32 (0.13) | 2.26 (0.96)  | <b>-3.91</b>  |                   | 3.22 (0.48)  | -2.95         |                   | 8.81 (0.38)  | 2.64           |                    |
|                   | FEP 8             | 6.29 (0.17) | 3.69 (0.00)  | -2.48         |                   | 4.27 (0.24)  | -1.90         |                   | 5.67 (0.13)  | -0.50          |                    |
|                   | PMB 0.5 + FEP 8   | 6.38 (0.11) | 3.49 (1.08)  | -2.68         | 1.23              | 1.96 (0.96)  | <b>-4.21</b>  | <b>-1.26</b>      | 3.24 (0.01)  | -2.93          | <b>-2.43</b>       |
|                   | Control           | 6.30 (0.01) | 7.97 (0.05)  | 1.80          |                   | 8.58 (0.05)  | 2.41          |                   | 9.61 (0.09)  | 3.44           |                    |
|                   | PMB 0.5           | 6.28 (0.09) | 3.42 (2.12)  | -2.75         |                   | 3.38 (0.64)  | -2.79         |                   | 8.88 (0.45)  | 2.71           |                    |
|                   | FOF 128           | 6.31 (0.16) | 5.56 (0.32)  | -0.61         |                   | 5.38 (0.07)  | -0.79         |                   | 9.49 (0.01)  | 3.32           |                    |
|                   | PMB 0.5 + FOF 128 | 6.43 (0.30) | 2.37 (0.29)  | <b>-3.80</b>  | <b>-1.05</b>      | 1.00 (0.00)  | <b>-5.17</b>  | <b>-2.38</b>      | 1.00 (0.00)  | <b>-5.17</b>   | <b>-7.88</b>       |
|                   | Control           | 6.39 (0.08) | 8.02 (0.00)  | 1.85          |                   | 8.71 (0.09)  | 2.54          |                   | 9.72 (0.02)  | 3.55           |                    |
|                   | PMB 0.5           | 6.42 (0.05) | 2.57 (0.29)  | <b>-3.60</b>  |                   | 3.32 (0.14)  | -2.85         |                   | 8.99 (0.51)  | 2.82           |                    |
|                   | LIN 16            | 6.42 (0.05) | 7.92 (0.09)  | 1.75          |                   | 8.53 (0.00)  | 2.36          |                   | 9.59 (0.14)  | 3.42           |                    |
|                   | PMB 0.5 + LIN 16  | 6.44 (0.05) | 4.00 (0.60)  | -2.17         | 1.43              | 4.73 (0.50)  | -1.44         | 1.41              | 8.54 (1.05)  | 2.37           | -0.45              |
|                   | Control           | 6.38 (0.07) | 7.86 (0.02)  | 1.69          |                   | 8.45 (0.02)  | 2.28          |                   | 9.65 (0.15)  | 3.48           |                    |
| PMB 0.25          | 6.67 (0.37)       | 6.86 (0.89) | 0.19         |               | 8.09 (0.26)       | 1.42         |               | 9.63 (0.09)       | 2.97         |                |                    |
| MEM 64            | 6.58 (0.10)       | 3.57 (0.14) | <b>-3.01</b> |               | 3.20 (0.02)       | <b>-3.38</b> |               | 3.98 (0.88)       | -0.65        |                |                    |
| PMB 0.25 + MEM 64 | 6.44 (0.12)       | 2.94 (1.47) | <b>-3.50</b> | <b>-1.46</b>  | 2.06 (1.06)       | <b>-4.38</b> | -0.63         | 2.24 (1.24)       | <b>-5.55</b> | <b>-1.74</b>   |                    |
| Control           | 6.62 (0.00)       | 8.07 (0.00) | 1.45         |               | 8.78 (0.00)       | 2.16         |               | 9.58 (0.00)       | 3.28         |                |                    |
| PMB 0.25          | 6.51 (0.00)       | 5.18 (1.13) | -0.99        |               | 5.76 (2.27)       | -0.41        |               | 9.60 (0.15)       | 3.43         |                |                    |
| MIN 16            | 6.43 (0.01)       | 7.69 (0.12) | 1.52         |               | 8.43 (0.02)       | 2.26         |               | 9.35 (0.21)       | 3.18         |                |                    |
| PMB 0.25 + MIN 16 | 6.45 (0.06)       | 5.87 (0.02) | -0.30        | 0.69          | 6.59 (0.08)       | 0.42         | 0.83          | 9.34 (0.12)       | 3.17         | -0.01          |                    |
| Control           | 6.44 (0.02)       | 8.09 (0.01) | 1.92         |               | 8.57 (0.06)       | 2.40         |               | 9.79 (0.00)       | 3.62         |                |                    |
| PMB 0.5           | 6.36 (0.03)       | 7.70 (0.02) | 1.53         |               | 8.46 (0.07)       | 2.29         |               | 9.68 (0.01)       | 3.51         |                |                    |
| TMC 64            | 6.39 (0.07)       | 7.80 (0.09) | 1.63         |               | 8.23 (0.01)       | 2.06         |               | 9.61 (0.08)       | 3.44         |                |                    |
| PMB 0.5 + TMC 64  | 6.35 (0.00)       | 7.35 (0.02) | 1.18         | -0.35         | 8.17 (0.05)       | 2.00         | -0.06         | 9.64 (0.13)       | 3.47         | 0.03           |                    |
| Control           | 6.38 (0.07)       | 7.86 (0.02) | 1.69         |               | 8.45 (0.02)       | 2.28         |               | 9.65 (0.15)       | 3.48         |                |                    |
| PMB 0.5           | 6.37 (0.09)       | 2.00 (0.08) | <b>-4.17</b> |               | 2.98 (0.35)       | <b>-3.19</b> |               | 8.25 (0.99)       | 2.08         |                |                    |
| THI 32            | 6.48 (0.16)       | 7.62 (0.09) | 1.45         |               | 8.44 (0.07)       | 2.27         |               | 9.03 (0.22)       | 2.86         |                |                    |
| PMB 0.5 + THI 32  | 6.38 (0.07)       | 2.48 (0.70) | <b>-3.69</b> | 0.48          | 2.13 (0.23)       | <b>-4.04</b> | -0.85         | 3.88 (1.38)       | -2.29        | <b>-4.36</b>   |                    |
| Control           | 6.42 (0.05)       | 7.74 (0.19) | 1.57         |               | 8.63 (0.00)       | 2.46         |               | 9.76 (0.09)       | 3.59         |                |                    |
| PMB 0.5           | 6.37 (0.09)       | 2.00 (0.08) | <b>-4.17</b> |               | 2.98 (0.35)       | <b>-3.19</b> |               | 8.25 (0.99)       | 2.08         |                |                    |
| TMP 8             | 6.41 (0.06)       | 7.94 (0.12) | 1.77         |               | 8.63 (0.06)       | 2.46         |               | 9.59 (0.03)       | 3.42         |                |                    |
| PMB 0.5 + TMP 8   | 6.39 (0.08)       | 2.70 (1.10) | <b>-3.47</b> | 0.70          | 3.36 (0.12)       | -2.81        | 0.38          | 8.69 (0.36)       | 2.52         | 0.44           |                    |
| Control           | 6.42 (0.05)       | 7.74 (0.19) | 1.57         |               | 8.63 (0.00)       | 2.46         |               | 9.76 (0.09)       | 3.59         |                |                    |

ARU622

Supplementary data

| Strain            | Antibiotics        | 0h          | 3h           | $\Delta_{3h}$ | Int <sub>3h</sub> | 6h           | $\Delta_{6h}$ | Int <sub>6h</sub> | 24h          | $\Delta_{24h}$ | Int <sub>24h</sub> |
|-------------------|--------------------|-------------|--------------|---------------|-------------------|--------------|---------------|-------------------|--------------|----------------|--------------------|
| ARU623            | PMB 0.25           | 6.25 (0.04) | 6.16 (0.06)  | -0.01         |                   | 7.60 (0.11)  | 1.43          |                   | 9.72 (0.19)  | 3.55           |                    |
|                   | AMK 16             | 6.34 (0.08) | 1.00 (0.00)  | <b>-6.17</b>  |                   | 2.30 (0.02)  | <b>-3.87</b>  |                   | 8.58 (0.07)  | 2.41           |                    |
|                   | PMB 0.25 + AMK 16  | 6.23 (0.03) | 1.80 (0.10)  | <b>-4.37</b>  | 1.80              | 1.39 (0.09)  | <b>-4.78</b>  | -0.91             | 7.63 (0.05)  | 1.46           | -0.95              |
|                   | Control            | 6.31 (0.04) | 7.89 (0.03)  | 1.72          |                   | 9.13 (0.01)  | 2.96          |                   | 9.59 (0.18)  | 3.42           |                    |
|                   | PMB 0.25           | 5.88 (0.26) | 6.30 (0.86)  | 0.13          |                   | 7.68 (0.77)  | 1.51          |                   | 9.35 (0.23)  | 3.18           |                    |
|                   | ATM 64             | 5.87 (0.26) | 5.12 (0.49)  | -1.05         |                   | 5.12 (0.66)  | -1.05         |                   | 6.14 (0.18)  | -0.03          |                    |
|                   | PMB 0.25 + ATM 64  | 5.82 (0.22) | 3.89 (0.17)  | -2.28         | -1.23             | 3.38 (0.49)  | -2.79         | -1.74             | 5.08 (0.37)  | -1.09          | -1.06              |
|                   | Control            | 5.94 (0.29) | 7.80 (0.22)  | 1.63          |                   | 8.40 (0.19)  | 2.23          |                   | 9.45 (0.08)  | 3.28           |                    |
|                   | PMB 0.25           | 5.88 (0.26) | 6.30 (0.86)  | 0.13          |                   | 7.68 (0.77)  | 1.51          |                   | 9.35 (0.23)  | 3.18           |                    |
|                   | FEP 64             | 5.77 (0.24) | 4.36 (0.00)  | -1.81         |                   | 4.13 (0.00)  | -2.04         |                   | 5.77 (0.04)  | -0.40          |                    |
|                   | PMB 0.25 + FEP 64  | 5.92 (0.12) | 3.22 (0.32)  | -2.95         | -1.14             | 2.36 (0.10)  | <b>-3.81</b>  | -1.77             | 4.12 (0.08)  | -2.05          | -1.65              |
|                   | Control            | 5.94 (0.29) | 7.80 (0.22)  | 1.63          |                   | 8.40 (0.19)  | 2.23          |                   | 9.45 (0.08)  | 3.28           |                    |
|                   | PMB 0.5            | 6.10 (0.12) | 2.25 (0.32)  | <b>-3.92</b>  |                   | 1.95 (0.47)  | <b>-4.22</b>  |                   | 5.40 (1.04)  | -0.77          |                    |
|                   | CHL 32             | 6.09 (0.01) | 6.98 (0.04)  | 0.81          |                   | 7.79 (0.01)  | 1.62          |                   | 8.89 (0.54)  | 2.72           |                    |
|                   | PMB 0.5 + CHL 32   | 6.17 (0.05) | 2.52 (0.16)  | <b>-3.65</b>  | 0.27              | 2.80 (0.20)  | <b>-3.37</b>  | 0.85              | 4.79 (0.45)  | -1.38          | -0.61              |
|                   | Control            | 6.16 (0.05) | 7.57 (0.06)  | 1.40          |                   | 8.32 (0.07)  | 2.15          |                   | 9.32 (0.22)  | 3.15           |                    |
|                   | PMB 0.25           | 6.25 (0.04) | 6.16 (0.06)  | -0.01         |                   | 7.60 (0.11)  | 1.43          |                   | 9.72 (0.19)  | 3.55           |                    |
|                   | CIP 2              | 6.28 (0.02) | 4.76 (0.23)  | -1.41         |                   | 4.13 (0.39)  | -2.04         |                   | 7.67 (0.59)  | 1.50           |                    |
|                   | PMB 0.25 + CIP 2   | 6.24 (0.09) | 1.67 (0.67)  | <b>-4.50</b>  | -3.09             | 2.50 (0.72)  | <b>-3.67</b>  | -1.63             | 8.34 (0.23)  | 2.17           | 0.67               |
|                   | Control            | 6.31 (0.04) | 7.89 (0.03)  | 1.72          |                   | 9.13 (0.01)  | 2.96          |                   | 9.59 (0.18)  | 3.42           |                    |
|                   | PMB 0.25           | 6.03 (0.19) | 6.18 (0.37)  | 0.01          |                   | 7.11 (0.57)  | 0.94          |                   | 9.45 (0.01)  | 3.28           |                    |
|                   | FOF 128            | 6.01 (0.18) | 6.47 (0.57)  | 0.30          |                   | 6.53 (0.90)  | 0.36          |                   | 9.38 (0.15)  | 3.21           |                    |
|                   | PMB 0.25 + FOF 128 | 5.96 (0.12) | 4.56 (0.82)  | -1.61         | -1.62             | 4.94 (1.47)  | -1.23         | -1.59             | 9.08 (0.38)  | 2.91           | -0.31              |
|                   | Control            | 6.05 (0.18) | 7.71 (0.00)  | 1.54          |                   | 8.19 (0.17)  | 2.02          |                   | 9.38 (0.15)  | 3.21           |                    |
| PMB 0.25          | 6.67 (0.37)        | 6.86 (0.88) | 0.69         |               | 8.08 (0.26)       | 1.91         |               | 9.62 (0.09)       | 3.45         |                |                    |
| MEM 16            | 6.57 (0.09)        | 3.56 (0.13) | -2.61        |               | 3.19 (0.01)       | -2.98        |               | 3.98 (0.87)       | -2.19        |                |                    |
| PMB 0.25 + MEM 16 | 6.43 (0.11)        | 2.94 (1.46) | <b>-3.23</b> | -0.62         | 2.06 (1.06)       | <b>-4.11</b> | -1.13         | 2.24 (1.24)       | <b>-3.93</b> | -1.74          |                    |
| Control           | 6.61 (0.00)        | 8.07 (0.00) | 1.90         |               | 8.77 (0.00)       | 2.60         |               | 9.58 (0.00)       | 3.41         |                |                    |
| PMB 0.25          | 6.20 (0.08)        | 7.60 (0.01) | 1.43         |               | 8.80 (0.00)       | 2.63         |               | 8.82 (0.76)       | 2.65         |                |                    |
| MIN 16            | 6.20 (0.07)        | 4.61 (0.00) | -1.56        |               | 4.58 (0.76)       | -1.59        |               | 7.35 (0.31)       | 1.18         |                |                    |
| PMB 0.25 + MIN 16 | 6.16 (0.15)        | 1.81 (1.81) | <b>-4.36</b> | -2.80         | 1.65 (1.65)       | <b>-4.52</b> | -2.93         | 3.60 (3.60)       | -2.57        | -3.75          |                    |
| Control           | 6.08 (0.06)        | 7.74 (0.01) | 1.57         |               | 8.54 (0.36)       | 2.37         |               | 9.02 (0.59)       | 2.85         |                |                    |
| PMB 0.25          | 6.13 (0.01)        | 7.67 (0.06) | 1.50         |               | 8.78 (0.00)       | 2.61         |               | 8.88 (0.82)       | 2.71         |                |                    |
| RIF 8             | 6.16 (0.10)        | 6.38 (0.22) | 0.21         |               | 7.40 (0.00)       | 1.23         |               | 6.66 (0.80)       | 0.49         |                |                    |
| PMB 0.25 + RIF 8  | 6.14 (0.19)        | 3.09 (3.09) | <b>-3.08</b> | -3.29         | 0.00 (2.91)       | <b>-6.17</b> | -7.40         | 2.83 (2.33)       | <b>-3.34</b> | -3.33          |                    |
| Control           | 6.03 (0.02)        | 7.83 (0.08) | 1.66         |               | 8.40 (0.22)       | 2.23         |               | 8.97 (0.54)       | 2.80         |                |                    |
| PMB 0.5           | 6.10 (0.12)        | 2.25 (0.32) | <b>-3.92</b> |               | 1.95 (0.47)       | <b>-4.22</b> |               | 5.40 (1.04)       | -0.77        |                |                    |
| TMC 64            | 6.07 (0.02)        | 7.47 (0.04) | 1.30         |               | 7.96 (0.03)       | 1.79         |               | 9.25 (0.11)       | 3.08         |                |                    |
| PMB 0.5 + TMC 64  | 6.11 (0.04)        | 2.22 (0.91) | <b>-3.95</b> | -0.03         | 2.54 (1.06)       | <b>-3.63</b> | 0.59          | 6.81 (0.19)       | 0.64         | 1.41           |                    |
| Control           | 6.16 (0.05)        | 7.57 (0.06) | 1.40         |               | 8.32 (0.07)       | 2.15         |               | 9.32 (0.22)       | 3.15         |                |                    |
| PMB 0.5           | 5.92 (0.06)        | 6.62 (0.10) | 0.45         |               | 8.20 (0.03)       | 2.03         |               | 8.63 (0.29)       | 2.46         |                |                    |
| THI 32            | 6.02 (0.05)        | 6.82 (0.01) | 0.65         |               | 8.08 (0.06)       | 1.91         |               | 8.00 (0.10)       | 1.83         |                |                    |
| PMB 0.5 + THI 32  | 5.92 (0.07)        | 5.27 (0.64) | -0.90        | -1.35         | 6.64 (1.64)       | 0.47         | -1.44         | 8.72 (0.71)       | 2.55         | 0.72           |                    |
| Control           | 5.92 (0.16)        | 7.29 (0.04) | 1.12         |               | 8.15 (0.03)       | 1.98         |               | 8.83 (0.35)       | 2.66         |                |                    |
| PMB 0.5           | 6.10 (0.12)        | 2.25 (0.32) | <b>-3.92</b> |               | 1.95 (0.47)       | <b>-4.22</b> |               | 5.40 (1.04)       | -0.77        |                |                    |
| TMP 8             | 6.08 (0.09)        | 7.52 (0.03) | 1.35         |               | 8.38 (0.10)       | 2.21         |               | 9.36 (0.04)       | 3.19         |                |                    |
| PMB 0.5 + TMP 8   | 6.10 (0.04)        | 1.74 (0.26) | <b>-4.43</b> | -0.51         | 1.15 (0.15)       | <b>-5.02</b> | -0.80         | 3.95 (0.46)       | -2.22        | -1.45          |                    |
| Control           | 6.16 (0.05)        | 7.57 (0.06) | 1.40         |               | 8.32 (0.07)       | 2.15         |               | 9.32 (0.22)       | 3.15         |                |                    |

Abbreviations: AMK, amikacin; ATM, aztreonam; FEP, cefepime; CHL, chloramphenicol; CIP, ciprofloxacin; FOF, fosfomicin; LIN, linezolid; MEM meropenem; MIN, minocycline; PMB, polymyxin B; RIF, rifampicin; TMC, temocillin; THI, thiamphenicol; TMP, trimethoprim.
